# Supplementary material
Source: PubMed Central journal article supplement (PMC10284350)
Supplement: ehp12034.s001.acco.pdf [file ehp12034.s001.acco.pdf]

**Note to readers with disabilities:** *EHP* strives to ensure that all journal content is accessible to all readers. However, some figures and Supplemental Material published in *EHP* articles may not conform to [508 standards](#) due to the complexity of the information being presented. If you need assistance accessing journal content, please contact [ehp508@niehs.nih.gov](mailto:ehp508@niehs.nih.gov). Our staff will work with you to assess and meet your accessibility needs within 3 working days.

### **Supplemental Material**

#### **Effects of Cyanobacterial Harmful Algal Bloom Toxin Microcystin-LR on Gonadotropin-Dependent Ovarian Follicle Maturation and Ovulation in Mice**

Yingzheng Wang, Pawat Pattarawat, Jiyang Zhang, Eunchong Kim, Delong Zhang, Mingzhu Fang, Elizabeth A. Jannaman, Ye Yuan, Saurabh Chatterjee, Ji-Yong Julie Kim, Geoffrey I. Scott, Qiang Zhang, and Shuo Xiao

#### **Table of Contents**

**Figure S1.** Detection of non-specific antibody binding in mouse ovary for the immunohistochemistry using normal rabbit IgG.

**Figure S2.** The *ex vivo* point of departure of MC-LR on failed follicle rupture and oocyte meiosis based on benchmark dose modeling. (A) Frequentist quantal linear model with BMR of 10% extra risk for the BMC and 95% lower confidence limit for the BMCL. (B) Frequentist Log-Probit model with BMR of 10% extra risk for the BMC and 95% lower confidence limit for the BMCL. BMR: benchmark response; BMC: benchmark concentration; BMCL: 95% lower confidence limit of BMC.

**Figure S3.** Quality control of single-follicle RNA sequencing reveals good sequencing quality, including sequencing read quality, number of detected genes, and read alignments. Data for Figure S3 can also be found in Table S26.

**Table S1.** Primer sequences used for RT-qPCR in this study.

**Table S2.** Numeric data for Figure 1B: body weight (g).

**Table S3.** Numeric data for Figure 1C: estrous cycle days.

**Table S4.** Numeric data for Figure 1E: total numbers of various stages of follicles per ovary in 1xPBS or MC-LR treated mice.

**Table S5.** Numeric data for Figure 1F: total numbers of corpora lutea (CL) per ovary in 1xPBS or MC-LR treated mice.

**Table S6.** Numeric data for Figure 2B: total numbers of ovulated oocytes from mice treated with 1xPBS or MC-LR.

**Table S7.** Numeric data for Figure 2D: percentages of ovulated MII oocytes (%) in mice treated with 1xPBS or MC-LR.

**Table S8.** Numeric data for Figure 2F: total numbers of un-ovulated late-staged antral follicles per mouse in 1xPBS or MC-LR treatment groups.

**Table S9.** Numeric data for Figure 3A: total numbers of ovulated oocytes and percentages of MII oocytes from mice treated with 1xPBS or MC-LR at 1 hour before hCG injection.

**Table S10.** Numeric data for Figure 3B: total numbers of ovulated oocytes and percentages of MII oocytes from mice treated with 1xPBS or MC-LR during follicle maturation window.

**Table S11.** Numeric data for Figure 4B: follicle diameter ( $\mu\text{m}$ ).

**Table S12.** Established follicle maturation-related genes and their functions.

**Table S13.** Numeric data for Figure 4D: gene expression.

**Table S14.** Numeric data for Figure 4E: Immunohistochemistry quantification for LHCGR.

**Table S15.** Numeric data for Figure 4F: Immunohistochemistry quantification for PAPPA.

**Table S16.** Numeric data for Figure 5B: follicle survival rate (%) upon MC-LR treatment.

**Table S17.** Numeric data for Figure 5C: follicle diameter ( $\mu\text{m}$ ) upon MC-LR treatment.

**Table S18.** Numeric data for Figure 5D: estradiol concentration (ng/mL) upon MC-LR treatment.

**Table S19.** Numeric data for Figure 5E: testosterone concentration (pg/mL) upon MC-LR treatment.

**Table S20.** Numeric data for Figure 5G: follicle rupture percentage (%) and MII oocyte percentage (%) upon MC-LR treatment.

**Table S21.** Numeric data for Figure 5H: progesterone concentration (ng/mL) upon MC-LR treatment.

**Table S22.** Numeric data for Figure 6B: expression of follicle maturation-related genes.

**Table S23.** Numeric data for Figure 6C: expression of follicle maturation-related genes in isolated mural granulosa cells.

**Table S24.** Established ovulatory genes and their identified functions in ovulation.

**Table S25.** Numeric data for Figure 6D: expression of established ovulatory genes in vehicle or MC-LR treated follicles.

**Table S26.** Quality control analysis of single-follicle RNA sequencing, including sequencing read quality and number of detected genes in control and MC-LR treated follicles.

**Table S27.** Original data for Figure 7C: Gene Ontology (GO) analysis of differentially expressed genes; Top 10 biological process (BP) enrichment results.

**Table S28.** Original data for Figure 7D: Gene Ontology (GO) analysis of differentially expressed genes; Top 10 molecular function (MF) enrichment results.

**Table S29.** Original data for Figure 7E: Gene Ontology (GO) analysis of differentially expressed genes; Top 10 cellular component (CC) enrichment results.

**Table S30.** Original data for Figure 7F: Top 10 KEGG pathway enrichment results of differentially expressed genes. KEGG: Kyoto Encyclopedia of Genes and Genomes.

**Table S31.** A summary of all overlapped 315 genes between MC-LR induced DEGs and previously identified FOXO1 target genes in the granulosa cells.

**Table S32.** Original data for Figure 7G: representative overlapped genes between differentially expressed genes identified in MC-LR treated murine follicles and FOXO1 target genes identified in rat granulosa cells.

**Table S33.** Numeric data for Figure 8A: PP1 phosphatase activity (picomoles) in vehicle or 10  $\mu$ M MC-LR treated follicles.

**Table S34.** Numeric data for Figure 8B: PP2A phosphatase activity (picomoles) in vehicle or 10  $\mu$ M MC-LR treated follicles.

**Table S35.** Numeric data for Figure 8D: quantification of examined proteins by western blotting.

**Table S36.** Numeric data for Figure 8E: diameters ( $\mu$ m) of follicles treated with vehicle or 10  $\mu$ M MC-LR in the presence or absence of 25  $\mu$ g/mL 740-YP.

**Table S37.** Numeric data for Figure 8F: survival rates (%) of follicles treated with vehicle or 10  $\mu$ M MC-LR in the presence or absence of 25  $\mu$ g/mL 740-YP.

**Table S38.** Numeric data for Figure 8G: expression of follicle maturation-related genes in follicles.

**Table S39.** Numeric data for Figure 8H: percentages of ruptured follicles at 16 hours post-hCG.

**Table S40.** Numeric data for Figure 9A: PP1 phosphatase activities in vehicle or 10  $\mu$ M MC-LR treated human primary granulosa cells.

**Table S41.** Numeric data for Figure 9B: PP2A phosphatase activities in vehicle or 10  $\mu$ M MC-LR treated human primary granulosa cells.

**Table S42.** Numeric data for Figure 9C: quantification of western blotting for phosphorylated FOXO1 in human primary granulosa cells.

**Table S43.** Numeric data for Figure 9D: expression of follicle maturation-related genes in vehicle or 10  $\mu$ M MC-LR treated human primary granulosa cells.

**Table S44.** Differential gene expression of oxidative stress genes induced by MC-LR using single-follicle RNA-seq.

**Table S45.** Differential gene expression of autophagy related genes induced by MC-LR using single-follicle RNA-seq.

**Table S46.** Differential gene expression of inflammation related genes induced by MC-LR using single-follicle RNA-seq.

## **References**

## Supplemental Figure

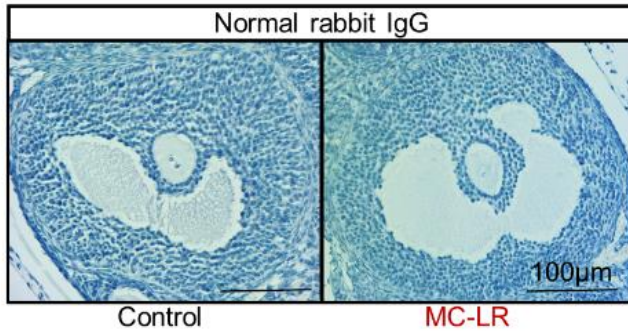

**Figure S1.** Detection of non-specific antibody binding in mouse ovary for the immunohistochemistry using normal rabbit IgG.

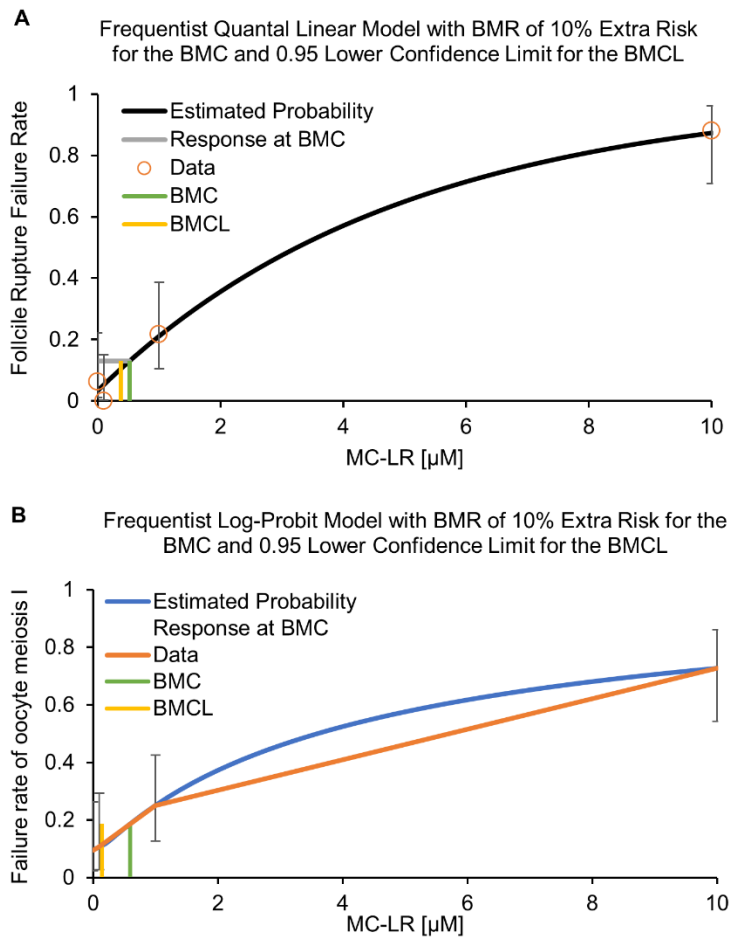

**Figure S2.** The *ex vivo* point of departure of MC-LR on failed follicle rupture and oocyte meiosis based on benchmark dose modeling. (A) Frequentist quantal linear model with BMR of 10% extra risk for the BMC and 95% lower confidence limit for the BMCL. (B) Frequentist Log-Probit model with BMR of 10% extra risk for the BMC and 95% lower confidence limit for the BMCL. BMR: benchmark response; BMC: benchmark concentration; BMCL: 95% lower confidence limit of BMC.

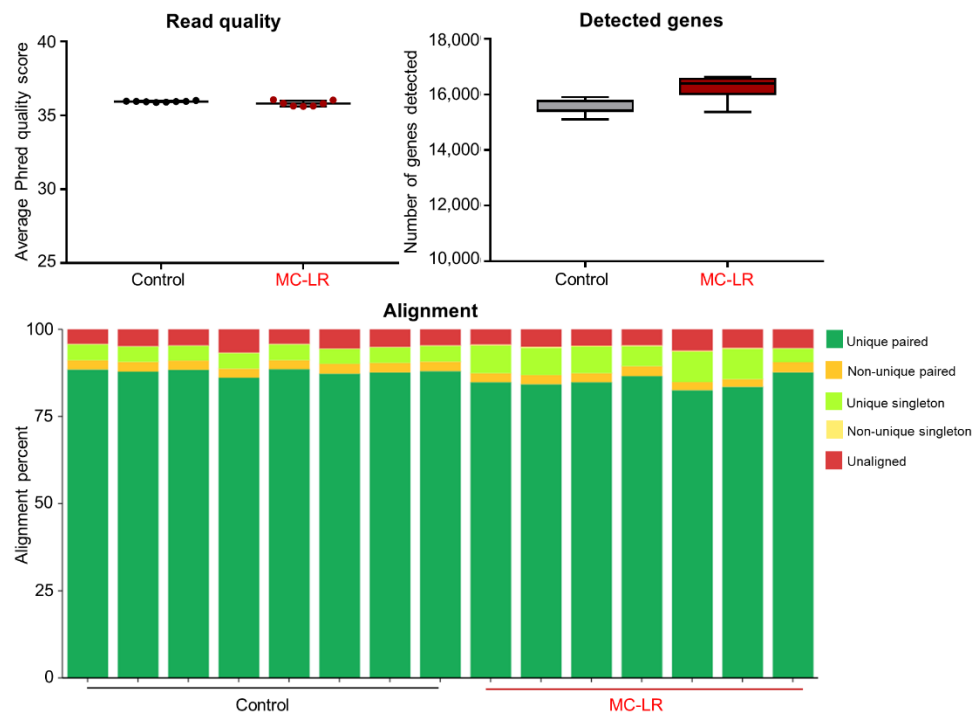

**Figure S3.** Quality control of single-follicle RNA sequencing reveals good sequencing quality, including sequencing read quality, number of detected genes, and read alignments. Data for Figure S3 can also be found in Table S26.

**Table S1.** Primer sequences used for RT-qPCR in this study.

| <b>Target gene</b> | <b>Forward Primer (5'-3')</b> | <b>Reverse Primer (5'-3')</b> |
|--------------------|-------------------------------|-------------------------------|
| <b>Mouse</b>       |                               |                               |
| <i>Gapdh</i>       | CATCACTGCCACCCAGAAGACT<br>G   | ATGCCAGTGAGCTTCCCGTTC<br>AG   |
| <i>Inha</i>        | CAGGCTATCCTTTTCCCAGCTAC       | AAGTCACCTGGTGGCTGCGT<br>AT    |
| <i>Inhba</i>       | GGAGATAGAGGACGACATTGGC        | ACGCTCCACTACTGACAGGTC<br>A    |
| <i>Inhbb</i>       | CTCCGAGATCATCAGCTTTGCAG       | GGAGCAGTTTCAGGTACAGC<br>CA    |
| <i>Comp</i>        | GTGCCCAACTTTGACCAGAGTG        | ACAGGCATCACCCACAAAGTC<br>G    |
| <i>Cyp19a1</i>     | CATGGTCCCGGAAACTGTGA          | GTAGTAGTTGCAGGCACTTC          |
| <i>Fshr</i>        | GAGGCAGATGTGTTCTCCAACC        | TCGGAGACTGGGAAGATTCT<br>GG    |
| <i>Lhcgr</i>       | GACGCTAATCTCGCTGGAGT          | GGCCTGCAATTTGGTGGAAAG         |
| <i>Pappa</i>       | CAGAAAGCCAGCACCTGTAGCT        | GGCAAAGGTCACATGCTGAT<br>CC    |
| <b>Human</b>       |                               |                               |
| <i>Gapdh</i>       | GTCTCCTCTGACTTCAACAGCG        | ACCACCCTGTTGCTGTAGCCA<br>A    |
| <i>Inha</i>        | TCCCAAGCCATCCTTTTCCCAG        | TCACCTGGCGGCTGCGTGTA<br>T     |
| <i>Inhba</i>       | GGATGACATTGGAAGGAGGGCA        | ACTGACAGGTCACTGCCTTCC<br>T    |
| <i>Inhbb</i>       | GAAATCATCAGCTTCGCCGAGAC       | GGCAGGAGTTTCAGGTAAAG<br>CC    |
| <i>Comp</i>        | GGAGATGCTTGTGACAGCGATC        | TGAGTCCTCCTGGGCACTGTT<br>A    |
| <i>Cyp19a1</i>     | GACGCAGGATTTCCACAGAAGA<br>G   | ATGGTGTCAGGAGCTGCGAT<br>CA    |
| <i>Fshr</i>        | GGTTTGTCTCCTACCAAGCTTCG       | GGTTGGAGAACACATCTGCCT<br>C    |
| <i>Lhcgr</i>       | GGAGAAGATGCACAATGGAGCC        | CGTGGCAATTAGCCTCTGAAT<br>GG   |
| <i>Pappa</i>       | GGAAGTGAAGAGAGTGAGCCAT<br>C   | CGTCGCATTGTTACCTTGGT<br>C     |

**Table S2.** Numeric data for Figure 1B: body weight (g).

| Day | Control (n=5) |     | MC-LR (n=5) |     |
|-----|---------------|-----|-------------|-----|
|     | Mean          | SD  | Mean        | SD  |
| 1   | 23.3          | 1.6 | 22.9        | 1.6 |
| 2   | 23.9          | 1.5 | 23.8        | 1.7 |
| 3   | 24.1          | 1.6 | 23.7        | 1.7 |
| 4   | 24.3          | 1.4 | 24.6        | 1.6 |
| 5   | 24.5          | 1.6 | 24.7        | 1.6 |
| 6   | 24.6          | 1.4 | 25.2        | 1.8 |
| 7   | 24.4          | 1.7 | 25.2        | 1.9 |
| 8   | 24.6          | 1.8 | 25.4        | 1.9 |
| 9   | 24.4          | 1.6 | 25.3        | 2.2 |
| 10  | 24.5          | 1.8 | 24.9        | 2.1 |
| 11  | 24.3          | 1.8 | 25.1        | 2.1 |
| 12  | 24.6          | 1.6 | 25.4        | 1.7 |
| 13  | 24.9          | 1.7 | 25.9        | 1.8 |
| 14  | 25.1          | 1.6 | 24.8        | 1.8 |
| 15  | 25.4          | 1.8 | 25.3        | 2.2 |
| 16  | 25.2          | 1.6 | 25.5        | 2.4 |
| 17  | 25.0          | 1.7 | 25.7        | 2.5 |
| 18  | 25.4          | 2.0 | 25.9        | 2.4 |
| 19  | 25.4          | 2.0 | 25.7        | 2.4 |
| 20  | 26.1          | 2.0 | 26.2        | 2.4 |
| 21  | 25.7          | 1.9 | 26.0        | 2.4 |
| 22  | 25.8          | 1.9 | 25.8        | 2.5 |
| 23  | 26.4          | 2.0 | 26.1        | 2.1 |
| 24  | 26.1          | 2.0 | 25.9        | 2.0 |
| 25  | 26.1          | 2.1 | 26.0        | 2.2 |
| 26  | 26.5          | 1.9 | 26.7        | 2.4 |
| 27  | 26.8          | 1.5 | 26.9        | 2.2 |
| 28  | 26.8          | 1.7 | 26.9        | 2.1 |
| 29  | 27.4          | 2.1 | 26.9        | 2.0 |
| 30  | 26.9          | 2.2 | 27.2        | 2.1 |
| 31  | 27.1          | 2.2 | 27.2        | 2.1 |
| 32  | 26.8          | 2.1 | 27.1        | 2.2 |
| 33  | 27.1          | 1.9 | 27.2        | 2.0 |
| 34  | 27.9          | 2.3 | 27.7        | 1.9 |
| 35  | 27.6          | 2.6 | 27.4        | 1.8 |
| 36  | 27.4          | 2.7 | 27.3        | 1.9 |
| 37  | 27.6          | 2.7 | 27.3        | 2.1 |
| 38  | 28.0          | 2.8 | 27.5        | 1.8 |
| 39  | 28.1          | 2.7 | 27.6        | 1.8 |
| 40  | 27.7          | 2.5 | 27.9        | 2.0 |
| 41  | 27.5          | 2.1 | 28.1        | 2.2 |
| 42  | 27.9          | 2.5 | 28.4        | 2.2 |
| 43  | 28.2          | 2.9 | 29.1        | 2.3 |



**Table S3.** Numeric data for Figure 1C: estrous cycle days.

|           | <b>Control (n=5)</b> |     | <b>MC-LR (n=5)</b> |     |
|-----------|----------------------|-----|--------------------|-----|
|           | Mean                 | SD  | Mean               | SD  |
| Proestrus | 3.2                  | 0.8 | 3.4                | 1.1 |
| Estrus    | 3.2                  | 0.4 | 3.8                | 1.9 |
| Metestrus | 3                    | 0.7 | 3.4                | 0.5 |
| Diestrus  | 5.6                  | 0.5 | 4.4                | 1.1 |

**Table S4.** Numeric data for Figure 1E: total numbers of various stages of follicles per ovary in 1xPBS or MC-LR treated mice.

| Follicle stage | <b>Control</b> |          |          |          |          | <b>MC-LR</b> |          |          |          |          |
|----------------|----------------|----------|----------|----------|----------|--------------|----------|----------|----------|----------|
|                | <b>1</b>       | <b>2</b> | <b>3</b> | <b>4</b> | <b>5</b> | <b>1</b>     | <b>2</b> | <b>3</b> | <b>4</b> | <b>5</b> |
| Primordial     | 704            | 615      | 654      | 834      | 631      | 918          | 587      | 650      | 623      | 559      |
| Primary        | 348            | 254      | 334      | 204      | 358      | 383          | 343      | 233      | 376      | 452      |
| Secondary      | 143            | 133      | 128      | 111      | 226      | 183          | 120      | 100      | 156      | 173      |
| Antral         | 19             | 12       | 12       | 14       | 23       | 12           | 15       | 15       | 16       | 24       |
| Atretic        | 97             | 52       | 62       | 84       | 99       | 94           | 99       | 78       | 94       | 93       |

**Table S5.** Numeric data for Figure 1F: total numbers of corpora lutea (CL) per ovary in 1xPBS or MC-LR treated mice.

|  | <b>Control</b> |          |          |          |          | <b>MC-LR</b> |          |          |          |          |
|--|----------------|----------|----------|----------|----------|--------------|----------|----------|----------|----------|
|  | <b>1</b>       | <b>2</b> | <b>3</b> | <b>4</b> | <b>5</b> | <b>1</b>     | <b>2</b> | <b>3</b> | <b>4</b> | <b>5</b> |
|  | 8              | 17       | 13       | 8        | 13       | 9            | 4        | 4        | 9        | 7        |

**Table S6.** Numeric data for Figure 2B: total numbers of ovulated oocytes from mice treated with 1xPBS or MC-LR.

| <b>Group</b> | <b>Mean</b> | <b>SD</b> | <b>n/group</b> |
|--------------|-------------|-----------|----------------|
| Control      | 38          | 8         | 9              |
| MC-LR        | 25          | 10        | 10             |

**Table S7.** Numeric data for Figure 2D: percentages of ovulated MII oocytes (%) in mice treated with 1xPBS or MC-LR.

| <b>Group</b> | <b>Mean</b> | <b>SD</b> | <b>n/group</b> |
|--------------|-------------|-----------|----------------|
| Control      | 97.1        | 2.8       | 9              |
| MC-LR        | 98.5        | 2.4       | 10             |

**Table S8.** Numeric data for Figure 2F: total numbers of un-ovulated late-staged antral follicles per mouse in 1xPBS or MC-LR treatment groups.

| <b>Group</b> | <b>Mean</b> | <b>SD</b> | <b>n/group</b> |
|--------------|-------------|-----------|----------------|
| Control      | 9           | 2         | 4              |
| MC-LR        | 16          | 4         | 4              |

**Table S9.** Numeric data for Figure 3A: total numbers of ovulated oocytes and percentages of MII oocytes from mice treated with 1xPBS or MC-LR at 1 hour before hCG injection.

| Group   | Number of ovulated oocytes |    | Percentage of MII oocytes (%) |    | n/group |
|---------|----------------------------|----|-------------------------------|----|---------|
|         | Mean                       | SD | Mean                          | SD |         |
| Control | 40                         | 10 | 94                            | 3  | 12      |
| MC-LR   | 42                         | 12 | 95                            | 3  | 14      |

**Table S10.** Numeric data for Figure 3B: total numbers of ovulated oocytes and percentages of MII oocytes from mice treated with 1xPBS or MC-LR during follicle maturation window.

| Group   | Number of ovulated oocytes |    | Percentage of MII oocytes (%) |    | n/group |
|---------|----------------------------|----|-------------------------------|----|---------|
|         | Mean                       | SD | Mean                          | SD |         |
| Control | 36                         | 11 | 95                            | 3  | 8       |
| MC-LR   | 24                         | 9  | 92                            | 6  | 9       |

**Table S11.** Numeric data for Figure 4B: follicle diameter ( $\mu\text{m}$ ).

| Group   | Mean  | SD   | n/group |
|---------|-------|------|---------|
| Control | 434.9 | 29.2 | 95      |
| MC-LR   | 438.1 | 35.1 | 91      |

**Table S12.** Established follicle maturation-related genes and their functions.

| Gene symbol  | Gene name                           | Functions and references                                                                                          |
|--------------|-------------------------------------|-------------------------------------------------------------------------------------------------------------------|
| <i>Inha</i>  | Inhibin subunit alpha               | Synthesis and secretion of ovarian peptide hormones of inhibin and activin and regulation of folliculogenesis [1] |
| <i>Inhba</i> | Inhibin subunit beta A              |                                                                                                                   |
| <i>Inhbb</i> | Inhibin subunit beta B              |                                                                                                                   |
| <i>Comp</i>  | Cartilage oligomeric matrix protein | A biomarker of FSH-dependent follicle maturation [2]                                                              |

|                |                                                 |                                                                            |
|----------------|-------------------------------------------------|----------------------------------------------------------------------------|
| <i>Cyp19a1</i> | Cytochrome P450 family 19 subfamily A member 1  | Estrogen synthesis [3]                                                     |
| <i>Fshr</i>    | Follicle stimulating hormone receptor           | Membrane receptor of FSH and activating FSH target signaling and genes [4] |
| <i>Lhcgr</i>   | Luteinizing hormone/choriogonadotropin receptor | Activation of LH mediated signaling pathways and target genes [5]          |
| <i>Pappa</i>   | Pregnancy-associated plasma protein A           | IGFBP protease; regulation of folliculogenesis and steroidogenesis [6]     |

**Table S13.** Numeric data for Figure 4D: gene expression.

| <b>Gene</b>    | <b>Group</b> | <b>Mean</b> | <b>SD</b> | <b>n/group</b> |
|----------------|--------------|-------------|-----------|----------------|
| <i>Inha</i>    | Control      | 74.4        | 35.8      | 24             |
|                | MC-LR        | 52.1        | 23.2      | 24             |
| <i>Inhba</i>   | Control      | 44.5        | 26.1      | 19             |
|                | MC-LR        | 35.8        | 17.5      | 23             |
| <i>Inhbb</i>   | Control      | 3.3         | 2.2       | 23             |
|                | MC-LR        | 2.4         | 1.1       | 24             |
| <i>Comp</i>    | Control      | 1.7         | 0.7       | 20             |
|                | MC-LR        | 1.3         | 0.5       | 25             |
| <i>Cyp19a1</i> | Control      | 11.1        | 6.8       | 24             |
|                | MC-LR        | 7.8         | 5.2       | 23             |
| <i>Fshr</i>    | Control      | 2.1         | 1.5       | 23             |
|                | MC-LR        | 2.0         | 1.1       | 23             |
| <i>Lhcgr</i>   | Control      | 5.1         | 4.2       | 24             |
|                | MC-LR        | 3.0         | 2.2       | 22             |
| <i>Pappa</i>   | Control      | 0.3         | 0.3       | 23             |
|                | MC-LR        | 0.1         | 0.0       | 23             |

**Table S14.** Numeric data for Figure 4E: Immunohistochemistry quantification for LHCGR.

|         | <b>Mean</b> | <b>SD</b> | <b>n/group</b> |
|---------|-------------|-----------|----------------|
| Control | 37.8        | 6.5       | 5              |
| MC-LR   | 8.0         | 2.2       | 5              |

**Table S15.** Numeric data for Figure 4F: Immunohistochemistry quantification for PAPPA.

|         | <b>Mean</b> | <b>SD</b> | <b>n/group</b> |
|---------|-------------|-----------|----------------|
| Control | 27.1        | 4.6       | 5              |
| MC-LR   | 5.2         | 2.3       | 5              |

**Table S16.** Numeric data for Figure 5B: follicle survival rate (%) upon MC-LR treatment.

| Day | Group       | Mean  | SD  | n/group |
|-----|-------------|-------|-----|---------|
| 0   | 0 $\mu$ M   | 100.0 | 0.0 | 43      |
|     | 0.1 $\mu$ M | 100.0 | 0.0 | 40      |
|     | 1 $\mu$ M   | 100.0 | 0.0 | 44      |
|     | 10 $\mu$ M  | 100.0 | 0.0 | 39      |
| 2   | 0 $\mu$ M   | 100.0 | 0.0 | 43      |
|     | 0.1 $\mu$ M | 100.0 | 0.0 | 40      |
|     | 1 $\mu$ M   | 100.0 | 0.0 | 44      |
|     | 10 $\mu$ M  | 100.0 | 0.0 | 39      |
| 4   | 0 $\mu$ M   | 97.6  | 4.1 | 43      |
|     | 0.1 $\mu$ M | 94.8  | 4.5 | 40      |
|     | 1 $\mu$ M   | 97.8  | 3.9 | 44      |
|     | 10 $\mu$ M  | 100.0 | 0.0 | 39      |
| 6   | 0 $\mu$ M   | 95.2  | 4.1 | 43      |
|     | 0.1 $\mu$ M | 92.1  | 8.4 | 40      |
|     | 1 $\mu$ M   | 95.6  | 3.9 | 44      |
|     | 10 $\mu$ M  | 92.3  | 7.7 | 39      |

**Table S17.** Numeric data for Figure 5C: follicle diameter ( $\mu$ m) upon MC-LR treatment.

| Day | Group       | Mean  | SD   | n/group |
|-----|-------------|-------|------|---------|
| 0   | 0 $\mu$ M   | 149.7 | 13.7 | 43      |
|     | 0.1 $\mu$ M | 150.7 | 11.3 | 40      |
|     | 1 $\mu$ M   | 150.0 | 13.1 | 44      |
|     | 10 $\mu$ M  | 151.0 | 11.0 | 39      |
| 2   | 0 $\mu$ M   | 194.9 | 25.4 | 43      |
|     | 0.1 $\mu$ M | 197.0 | 19.2 | 40      |
|     | 1 $\mu$ M   | 194.9 | 27.0 | 44      |
|     | 10 $\mu$ M  | 195.8 | 22.2 | 39      |
| 4   | 0 $\mu$ M   | 279.9 | 30.2 | 43      |
|     | 0.1 $\mu$ M | 280.9 | 28.4 | 40      |
|     | 1 $\mu$ M   | 277.1 | 38.7 | 44      |
|     | 10 $\mu$ M  | 286.2 | 34.4 | 39      |
| 6   | 0 $\mu$ M   | 337.5 | 34.6 | 43      |
|     | 0.1 $\mu$ M | 335.9 | 43.0 | 40      |
|     | 1 $\mu$ M   | 333.4 | 41.1 | 44      |
|     | 10 $\mu$ M  | 330.6 | 36.8 | 39      |

**Table S18.** Numeric data for Figure 5D: estradiol concentration (ng/mL) upon MC-LR treatment.

| Group       | Mean | SD   | n/group |
|-------------|------|------|---------|
| 0 $\mu$ M   | 26.3 | 18.4 | 10      |
| 0.1 $\mu$ M | 28.9 | 18.4 | 11      |
| 1 $\mu$ M   | 22.4 | 23.7 | 12      |
| 10 $\mu$ M  | 21.1 | 10.5 | 10      |

**Table S19.** Numeric data for Figure 5E: testosterone concentration (pg/mL) upon MC-LR treatment.

| Group       | Mean   | SD    | n/group |
|-------------|--------|-------|---------|
| 0 $\mu$ M   | 1142.9 | 714.3 | 10      |
| 0.1 $\mu$ M | 964.3  | 696.4 | 12      |
| 1 $\mu$ M   | 1000.0 | 875.0 | 11      |
| 10 $\mu$ M  | 1214.3 | 928.5 | 12      |

**Table S20.** Numeric data for Figure 5G: follicle rupture percentage (%) and MII oocyte percentage (%) upon MC-LR treatment.

|                             | Group       | Mean  | SD  | n/group |
|-----------------------------|-------------|-------|-----|---------|
| Follicle rupture percentage | 0 $\mu$ M   | 100.0 | 0.0 | 43      |
|                             | 0.1 $\mu$ M | 100.0 | 0.0 | 40      |
|                             | 1 $\mu$ M   | 77.5  | 7.9 | 44      |
|                             | 10 $\mu$ M  | 11.9  | 3.2 | 39      |
| MII oocyte percentage       | 0 $\mu$ M   | 91.1  | 8.4 | 43      |
|                             | 0.1 $\mu$ M | 89.2  | 1.4 | 40      |
|                             | 1 $\mu$ M   | 74.6  | 4.0 | 44      |
|                             | 10 $\mu$ M  | 27.2  | 7.9 | 39      |

**Table S21.** Numeric data for Figure 5H: progesterone concentration (ng/mL) upon MC-LR treatment.

| Group       | Mean  | SD   | n/group |
|-------------|-------|------|---------|
| 0 $\mu$ M   | 94.5  | 59.1 | 14      |
| 0.1 $\mu$ M | 103.6 | 62.7 | 14      |
| 1 $\mu$ M   | 74.6  | 48.3 | 17      |
| 10 $\mu$ M  | 23.6  | 10.9 | 16      |

**Table S22.** Numeric data for Figure 6B: expression of follicle maturation-related genes.

| Gene         | Day | Group   | Mean (a.u.) | SD   | n/group |
|--------------|-----|---------|-------------|------|---------|
| <i>Comp</i>  | 0   | Control | 1.3         | 0.5  | 8       |
|              |     | MC-LR   | 1.3         | 0.3  | 8       |
|              |     | MC-LR   | 1.5         | 0.6  | 8       |
|              | 6   | Control | 2.6         | 1.4  | 7       |
|              |     | MC-LR   | 16.7        | 5.3  | 8       |
|              |     | MC-LR   | 4.6         | 2.8  | 8       |
| <i>Inha</i>  | 0   | Control | 143.5       | 60.9 | 8       |
|              |     | MC-LR   | 252.2       | 50.0 | 8       |
|              |     | MC-LR   | 265.2       | 41.3 | 8       |
|              | 6   | Control | 221.7       | 34.8 | 7       |
|              |     | MC-LR   | 352.2       | 71.7 | 8       |
|              |     | MC-LR   | 178.3       | 52.2 | 8       |
| <i>Inhba</i> | 0   | Control | 0.9         | 0.4  | 8       |
|              |     | MC-LR   | 17.6        | 25.4 | 8       |
|              | 4   | Control | 80.5        | 22.7 | 8       |
|              |     | MC-LR   | 58.8        | 27.6 | 7       |

|                |   |         |       |      |   |
|----------------|---|---------|-------|------|---|
|                | 6 | Control | 114.5 | 17.3 | 8 |
|                |   | MC-LR   | 79.4  | 12.8 | 8 |
| <i>Inhbb</i>   | 0 | Control | 2.5   | 1.5  | 8 |
|                | 2 | Control | 10.4  | 9.2  | 8 |
|                | 4 | Control | 17.7  | 2.8  | 8 |
|                |   | MC-LR   | 9.6   | 4.1  | 7 |
|                | 6 | Control | 17.6  | 4.6  | 8 |
|                |   | MC-LR   | 11.9  | 3.5  | 8 |
| <i>Cyp19a1</i> | 0 | Control | 0.5   | 0.2  | 8 |
|                | 2 | Control | 1.0   | 0.9  | 8 |
|                | 4 | Control | 2.8   | 0.6  | 8 |
|                |   | MC-LR   | 2.1   | 0.5  | 7 |
|                | 6 | Control | 5.5   | 1.1  | 8 |
|                |   | MC-LR   | 2.9   | 1.6  | 8 |
| <i>Pappa</i>   | 0 | Control | 0.1   | 0.1  | 8 |
|                | 2 | Control | 0.1   | 0.1  | 8 |
|                | 4 | Control | 0.1   | 0.1  | 8 |
|                |   | MC-LR   | 0.1   | 0.0  | 7 |
|                | 6 | Control | 0.6   | 0.2  | 8 |
|                |   | MC-LR   | 0.1   | 0.1  | 8 |
| <i>Fshr</i>    | 0 | Control | 1.6   | 0.8  | 8 |
|                | 2 | Control | 4.5   | 1.0  | 8 |
|                | 4 | Control | 4.7   | 1.0  | 8 |
|                |   | MC-LR   | 5.1   | 1.2  | 7 |
|                | 6 | Control | 5.2   | 1.1  | 8 |
|                |   | MC-LR   | 3.3   | 1.2  | 8 |
| <i>Lhcgr</i>   | 0 | Control | 1.7   | 0.8  | 8 |
|                | 2 | Control | 3.1   | 0.5  | 8 |
|                | 4 | Control | 2.0   | 0.5  | 8 |
|                |   | MC-LR   | 1.5   | 0.4  | 7 |
|                | 6 | Control | 9.2   | 3.4  | 8 |
|                |   | MC-LR   | 1.7   | 1.2  | 8 |

Note: the mRNA expression levels of each gene were normalized by the expression of glyceraldehyde-3-phosphate dehydrogenase (*Gapdh*).

**Table S23.** Numeric data for Figure 6C: expression of follicle maturation-related genes in isolated mural granulosa cells.

| Gene         | Group   | Mean (a.u.) | SD   | n/group |
|--------------|---------|-------------|------|---------|
| <i>Comp</i>  | Control | 4.8         | 3.9  | 9       |
|              | MC-LR   | 1.8         | 0.8  | 8       |
| <i>Inha</i>  | Control | 86.3        | 13.2 | 9       |
|              | MC-LR   | 48.2        | 23.9 | 8       |
| <i>Inhba</i> | Control | 55.8        | 13.9 | 9       |
|              | MC-LR   | 39.7        | 15.1 | 8       |
| <i>Inhbb</i> | Control | 6.6         | 1.7  | 9       |
|              | MC-LR   | 4.2         | 2.6  | 8       |

|                |         |     |     |   |
|----------------|---------|-----|-----|---|
| <i>Cyp19a1</i> | Control | 1.5 | 0.2 | 9 |
|                | MC-LR   | 1.0 | 0.5 | 8 |
| <i>Pappa</i>   | Control | 0.4 | 0.1 | 9 |
|                | MC-LR   | 0.1 | 0.1 | 8 |
| <i>Fshr</i>    | Control | 1.9 | 0.6 | 9 |
|                | MC-LR   | 1.2 | 0.7 | 8 |
| <i>Lhcgr</i>   | Control | 2.1 | 1.2 | 9 |
|                | MC-LR   | 0.4 | 0.3 | 8 |

**Table S24.** Established ovulatory genes and their identified functions in ovulation.

| <b>Gene symbol</b> | <b>Gene name</b>                       | <b>Functions and references</b>                                                                                   |
|--------------------|----------------------------------------|-------------------------------------------------------------------------------------------------------------------|
| <i>Pgr</i>         | Progesterone receptor                  | Follicle rupture [7]                                                                                              |
| <i>Runx1</i>       | Runt-related transcription factor 1    | Progesterone production [8]                                                                                       |
| <i>Areg</i>        | Amphiregulin                           | Activation of EGF signaling to regulate COC expansion, oocyte maturation, follicle rupture, and luteinization [9] |
| <i>Ereg</i>        | Epiregulin                             |                                                                                                                   |
| <i>Btc</i>         | Betacellulin                           |                                                                                                                   |
| <i>Plau</i>        | Plasminogen activator, urokinase       | ECM remodeling and follicle rupture [10]                                                                          |
| <i>Ptgs2</i>       | Prostaglandin-endoperoxide synthase 2  | Prostaglandin production, COC expansion, and oocyte maturation [11, 12]                                           |
| <i>Tnfaip6</i>     | Tumor necrosis factor-inducible gene 6 | COC expansion [13]                                                                                                |

**Table S25.** Numeric data for Figure 6D: expression of established ovulatory genes in vehicle or MC-LR treated follicles.

| Gene           | Group   | Mean (a.u.) | SD  | n/group |
|----------------|---------|-------------|-----|---------|
| <i>Pgr</i>     | Control | 1.0         | 0.4 | 12      |
|                | MC-LR   | 0.1         | 0.1 | 10      |
| <i>Runx1</i>   | Control | 1.0         | 0.1 | 12      |
|                | MC-LR   | 0.5         | 0.2 | 10      |
| <i>Areg</i>    | Control | 1.0         | 0.6 | 12      |
|                | MC-LR   | 0.5         | 0.3 | 10      |
| <i>Ereg</i>    | Control | 1.0         | 0.5 | 12      |
|                | MC-LR   | 0.5         | 0.3 | 10      |
| <i>Btc</i>     | Control | 1.0         | 0.3 | 12      |
|                | MC-LR   | 0.4         | 0.2 | 10      |
| <i>Plau</i>    | Control | 1.0         | 0.4 | 12      |
|                | MC-LR   | 0.3         | 0.1 | 10      |
| <i>Ptgs2</i>   | Control | 1.0         | 0.4 | 12      |
|                | MC-LR   | 0.3         | 0.1 | 10      |
| <i>Tnfaip6</i> | Control | 1.0         | 0.3 | 12      |
|                | MC-LR   | 0.4         | 0.1 | 10      |

**Table S26.** Quality control analysis of single-follicle RNA sequencing, including sequencing read quality and number of detected genes in control and MC-LR treated follicles.

|                | Average Phred quality score |      | Number of detected genes (x10 <sup>3</sup> ) |                |        |                |       | n/group |
|----------------|-----------------------------|------|----------------------------------------------|----------------|--------|----------------|-------|---------|
|                | Mean                        | SD   | Max                                          | Upper Quartile | Median | Lower Quartile | Min   |         |
| <b>Control</b> | 35.92                       | 0.04 | 15.94                                        | 15.79          | 15.46  | 15.43          | 15.14 | 8       |
| <b>MC-LR</b>   | 35.78                       | 0.19 | 16.67                                        | 16.60          | 16.44  | 16.06          | 15.40 | 7       |

**Table S27.** Original data for Figure 7C: Gene Ontology (GO) analysis of differentially expressed genes; Top 10 biological process (BP) enrichment results.

| GO_BP_Term                                                       | Count | Gene ratio | FDR        |
|------------------------------------------------------------------|-------|------------|------------|
| transmembrane receptor protein tyrosine kinase signaling pathway | 43    | 0.43       | 4.4351E-08 |
| positive regulation of apoptotic process                         | 98    | 0.29253731 | 2.9282E-08 |
| positive regulation of angiogenesis                              | 49    | 0.40495868 | 2.8712E-08 |
| positive regulation of cell proliferation                        | 141   | 0.2601476  | 2.2946E-08 |
| inflammatory response                                            | 104   | 0.30232558 | 1.1675E-09 |
| axon guidance                                                    | 59    | 0.39597315 | 1.1133E-09 |
| multicellular organism development                               | 251   | 0.24392614 | 1.0842E-12 |
| positive regulation of cell migration                            | 83    | 0.408867   | 1.9365E-15 |
| angiogenesis                                                     | 93    | 0.38912134 | 1.044E-15  |
| cell adhesion                                                    | 170   | 0.35051546 | 1.8929E-24 |



**Table S28.** Original data for Figure 7D: Gene Ontology (GO) analysis of differentially expressed genes; Top 10 molecular function (MF) enrichment results.

| GO_MF_Term                                              | Count | Gene ratio | FDR      |
|---------------------------------------------------------|-------|------------|----------|
| protein binding                                         | 785   | 0.19183773 | 3.47E-13 |
| heparin binding                                         | 61    | 0.40397351 | 1.11E-10 |
| integrin binding                                        | 47    | 0.47       | 1.11E-10 |
| protein homodimerization activity                       | 187   | 0.23433584 | 1.14E-07 |
| calcium ion binding                                     | 165   | 0.2360515  | 6.56E-07 |
| collagen binding                                        | 29    | 0.49152542 | 1.19E-06 |
| extracellular matrix binding                            | 19    | 0.67857143 | 1.19E-06 |
| fibronectin binding                                     | 19    | 0.65517241 | 2.35E-06 |
| transmembrane receptor protein tyrosine kinase activity | 26    | 0.48148148 | 1.04E-05 |
| receptor binding                                        | 104   | 0.25242718 | 1.41E-05 |

**Table S29.** Original data for Figure 7E: Gene Ontology (GO) analysis of differentially expressed genes; Top 10 cellular component (CC) enrichment results.

| GO_CC_Term                         | Count | Gene ratio | FDR        |
|------------------------------------|-------|------------|------------|
| membrane                           | 1372  | 0.19605602 | 1.313E-40  |
| proteinaceous extracellular matrix | 138   | 0.43670886 | 2.5886E-32 |
| extracellular region               | 445   | 0.25385054 | 1.1849E-31 |
| cell surface                       | 191   | 0.3036566  | 1.8126E-21 |
| extracellular matrix               | 106   | 0.36054422 | 3.6617E-17 |
| extracellular exosome              | 553   | 0.20680628 | 6.3114E-17 |
| extracellular space                | 347   | 0.23071809 | 6.3114E-17 |
| cell junction                      | 189   | 0.2632312  | 4.9111E-14 |
| basement membrane                  | 48    | 0.49484536 | 3.7405E-13 |
| cytoplasm                          | 1160  | 0.17493591 | 8.4855E-12 |

**Table S30.** Original data for Figure 7F: Top 10 KEGG pathway enrichment results of differentially expressed genes. KEGG: Kyoto Encyclopedia of Genes and Genomes.

| KEGG_Term                               | Count | Gene ratio | FDR        |
|-----------------------------------------|-------|------------|------------|
| ECM-receptor interaction                | 51    | 0.57954545 | 2.8067E-16 |
| Focal adhesion                          | 81    | 0.39130435 | 1.3495E-13 |
| PI3K-Akt signaling pathway              | 113   | 0.32193732 | 1.6404E-12 |
| Proteoglycans in cancer                 | 69    | 0.33990148 | 1.9592E-08 |
| Pathways in cancer                      | 109   | 0.27594937 | 9.9682E-08 |
| Transcriptional misregulation in cancer | 58    | 0.35151515 | 9.9682E-08 |
| Axon guidance                           | 48    | 0.37209302 | 3.1819E-07 |
| MAPK signaling pathway                  | 74    | 0.29482072 | 2.1515E-06 |
| Amoebiasis                              | 43    | 0.36752137 | 2.4771E-06 |
| Hypertrophic cardiomyopathy (HCM)       | 33    | 0.41772152 | 3.1271E-06 |

**Table S31.** A summary of all overlapped 315 genes between MC-LR induced DEGs and previously identified FOXO1 target genes in the granulosa cells.

| <b>FOXO1<br/>upregulated<br/>genes</b> | <b>FDR</b> | <b>Fold<br/>change</b> | <b>FOXO1<br/>downregulated<br/>genes</b> | <b>FDR</b> | <b>Fold<br/>change</b> |
|----------------------------------------|------------|------------------------|------------------------------------------|------------|------------------------|
| <i>Spp1</i>                            | 2.11E-34   | 719.78                 | <i>Ache</i>                              | 2.07E-05   | -14.00                 |
| <i>Serp1nb2</i>                        | 4.19E-19   | 124.90                 | <i>Pappa</i>                             | 1.28E-23   | -8.42                  |
| <i>Cemip</i>                           | 2.41E-14   | 76.18                  | <i>Gja5</i>                              | 0.010856   | -8.13                  |
| <i>Ankrd1</i>                          | 8.14E-07   | 73.48                  | <i>Lhcgr</i>                             | 2.79E-16   | -6.81                  |
| <i>Gbp5</i>                            | 7.23E-06   | 58.35                  | <i>Dnah2</i>                             | 2.97E-32   | -6.18                  |
| <i>Eef1a2</i>                          | 9.42E-05   | 49.45                  | <i>Cacna1d</i>                           | 9.89E-19   | -5.10                  |
| <i>Actc1</i>                           | 6.55E-07   | 48.60                  | <i>Pla2g1b</i>                           | 0.000983   | -4.18                  |
| <i>Cldn2</i>                           | 1.26E-06   | 40.38                  | <i>Flvcr2</i>                            | 2.4E-17    | -3.79                  |
| <i>Tnc</i>                             | 6.27E-26   | 33.03                  | <i>Fgf11</i>                             | 3.28E-10   | -3.44                  |
| <i>Robo3</i>                           | 0.000251   | 21.22                  | <i>Hao2</i>                              | 1.28E-15   | -3.42                  |
| <i>Edn1</i>                            | 7.53E-26   | 19.55                  | <i>Srcin1</i>                            | 3.86E-25   | -3.39                  |
| <i>Ngf</i>                             | 0.03522    | 19.46                  | <i>Nxn1</i>                              | 8.73E-06   | -3.34                  |
| <i>Dusp4</i>                           | 4.89E-30   | 16.86                  | <i>Tmem25</i>                            | 1.18E-13   | -3.23                  |
| <i>Hsd11b1</i>                         | 5.09E-05   | 16.84                  | <i>Nos3</i>                              | 1.47E-10   | -3.21                  |
| <i>Muc6</i>                            | 0.000732   | 16.43                  | <i>Srgap3</i>                            | 1.6E-06    | -3.20                  |
| <i>Tmod1</i>                           | 4.93E-17   | 16.27                  | <i>Cyp19a1</i>                           | 6.27E-06   | -3.18                  |
| <i>Spink8</i>                          | 0.027359   | 15.60                  | <i>Cox4i2</i>                            | 4.76E-08   | -3.14                  |
| <i>Prune2</i>                          | 2.99E-51   | 15.55                  | <i>Pcdh8</i>                             | 0.006074   | -3.08                  |
| <i>Wnt16</i>                           | 0.009025   | 15.25                  | <i>Adgrg1</i>                            | 1.01E-11   | -3.03                  |
| <i>Arid5a</i>                          | 2.79E-25   | 12.83                  | <i>Spdya</i>                             | 0.000174   | -2.94                  |
| <i>Sfn2</i>                            | 1.29E-07   | 12.02                  | <i>Rapsn</i>                             | 0.000418   | -2.89                  |
| <i>Creb5</i>                           | 8.14E-71   | 9.93                   | <i>Naglu</i>                             | 6.03E-39   | -2.89                  |
| <i>Tnfrsf12a</i>                       | 1.26E-60   | 9.46                   | <i>Flt4</i>                              | 1.52E-18   | -2.87                  |
| <i>Sfrp2</i>                           | 5.49E-08   | 8.50                   | <i>Ccrl2</i>                             | 2.83E-05   | -2.86                  |
| <i>Pth2r</i>                           | 0.012956   | 8.23                   | <i>Fam180a</i>                           | 0.00013    | -2.86                  |
| <i>Gpnmb</i>                           | 3.05E-06   | 8.09                   | <i>Pdpx</i>                              | 1.43E-25   | -2.83                  |
| <i>Serpine1</i>                        | 7E-06      | 7.39                   | <i>Gldn</i>                              | 3.46E-11   | -2.79                  |
| <i>B3gnt5</i>                          | 6.37E-06   | 7.24                   | <i>Nppc</i>                              | 7.61E-05   | -2.77                  |
| <i>Tnnc1</i>                           | 0.000877   | 7.18                   | <i>Smpd3</i>                             | 8.93E-05   | -2.75                  |
| <i>Zfp365</i>                          | 3.3E-25    | 7.09                   | <i>Slc35g2</i>                           | 3.14E-09   | -2.68                  |
| <i>Megf10</i>                          | 1.74E-10   | 6.93                   | <i>Proser2</i>                           | 1.98E-20   | -2.54                  |
| <i>Stmn4</i>                           | 2.18E-06   | 6.37                   | <i>Kcnh2</i>                             | 4.54E-14   | -2.49                  |
| <i>Cdkn2b</i>                          | 5.14E-12   | 6.33                   | <i>Hsd17b1</i>                           | 8.63E-19   | -2.48                  |
| <i>Xdh</i>                             | 1.38E-11   | 6.20                   | <i>Lmo2</i>                              | 0.001455   | -2.43                  |
| <i>Mgp</i>                             | 1.73E-12   | 6.15                   | <i>Tmem107</i>                           | 8.1E-14    | -2.42                  |
| <i>Fn1</i>                             | 1.15E-18   | 5.93                   | <i>Dock2</i>                             | 0.000714   | -2.41                  |
| <i>Pamr1</i>                           | 1.53E-08   | 5.82                   | <i>Dhh</i>                               | 5.6E-15    | -2.38                  |
| <i>Etv4</i>                            | 1.57E-08   | 5.55                   | <i>Sh3d21</i>                            | 1.54E-07   | -2.35                  |
| <i>Thbd</i>                            | 1.6E-23    | 5.44                   | <i>Spata18</i>                           | 4.57E-06   | -2.34                  |
| <i>Snai1</i>                           | 1.97E-14   | 5.31                   | <i>Sox8</i>                              | 1.35E-05   | -2.25                  |

|                |          |      |                 |          |       |
|----------------|----------|------|-----------------|----------|-------|
| <i>Slc9a9</i>  | 8.26E-09 | 5.19 | <i>Fam229b</i>  | 0.024098 | -2.22 |
| <i>Tagln</i>   | 1.36E-05 | 5.02 | <i>Kctd14</i>   | 8.83E-06 | -2.22 |
| <i>Pxdc1</i>   | 2.88E-09 | 4.98 | <i>Adamtsl2</i> | 0.045963 | -2.21 |
| <i>Bdnf</i>    | 2.5E-09  | 4.81 | <i>Pm20d2</i>   | 5.26E-10 | -2.20 |
| <i>Fbxo32</i>  | 3.57E-14 | 4.78 | <i>Tbata</i>    | 0.004254 | -2.19 |
| <i>Mreg</i>    | 2.65E-09 | 4.57 | <i>Pyroxd2</i>  | 0.00118  | -2.16 |
| <i>Osmr</i>    | 2.91E-05 | 4.54 | <i>Prlr</i>     | 1.16E-11 | -2.16 |
| <i>Prdm1</i>   | 2.18E-07 | 4.44 | <i>Lrrc56</i>   | 8E-05    | -2.15 |
| <i>Ntn4</i>    | 3.03E-08 | 4.39 | <i>Cacna1a</i>  | 1.99E-08 | -2.12 |
| <i>Adora2b</i> | 9.98E-05 | 4.25 | <i>Acsbg1</i>   | 2.56E-11 | -2.12 |
| <i>Rragd</i>   | 5.38E-29 | 4.24 | <i>Cbs</i>      | 2.9E-08  | -2.10 |
| <i>Mmp28</i>   | 0.000217 | 4.20 | <i>E2f7</i>     | 1.58E-06 | -2.08 |
| <i>Gadd45a</i> | 2.19E-35 | 4.03 | <i>Rnf208</i>   | 0.004213 | -2.03 |
| <i>Pdk4</i>    | 1.16E-14 | 3.98 | <i>Lym9</i>     | 6.22E-10 | -2.03 |
| <i>Myc</i>     | 8.35E-32 | 3.97 | <i>Zfp879</i>   | 0.040633 | -1.96 |
| <i>Hgf</i>     | 6.83E-11 | 3.89 | <i>Psmb9</i>    | 1.24E-10 | -1.96 |
| <i>Lox</i>     | 0.000106 | 3.85 | <i>Cebpa</i>    | 1.03E-35 | -1.95 |
| <i>Anxa1</i>   | 5.93E-24 | 3.76 | <i>Gsta2</i>    | 8.49E-05 | -1.94 |
| <i>Synj2</i>   | 4.21E-17 | 3.75 | <i>Miip</i>     | 3.04E-05 | -1.93 |
| <i>Gpr176</i>  | 0.031448 | 3.71 | <i>Plekhd1</i>  | 2.56E-17 | -1.92 |
| <i>Hmgcll1</i> | 1.86E-05 | 3.53 | <i>Mgarp</i>    | 4.19E-13 | -1.92 |
| <i>Rnd3</i>    | 3.86E-29 | 3.38 | <i>Gstt3</i>    | 0.005121 | -1.92 |
| <i>Dkk3</i>    | 8.55E-18 | 3.37 | <i>Plxnc1</i>   | 5.41E-40 | -1.91 |
| <i>Gadd45b</i> | 4.85E-09 | 3.36 | <i>Cbfa2t3</i>  | 0.005867 | -1.91 |
| <i>Hspb1</i>   | 3.01E-18 | 3.32 | <i>Aldh3b1</i>  | 2.47E-09 | -1.90 |
| <i>Cald1</i>   | 3.78E-24 | 3.31 | <i>Folr1</i>    | 4.24E-10 | -1.90 |
| <i>Gypc</i>    | 6.96E-12 | 3.28 | <i>Rhbdl1</i>   | 6.58E-05 | -1.89 |
| <i>Dock10</i>  | 8.05E-05 | 3.25 | <i>Fanca</i>    | 3.34E-06 | -1.88 |
| <i>Cilp</i>    | 0.010349 | 3.24 | <i>Prkar2b</i>  | 3.65E-12 | -1.87 |
| <i>Srgap1</i>  | 9.4E-12  | 3.23 | <i>Efnb3</i>    | 2.23E-05 | -1.86 |
| <i>Fcgr2b</i>  | 0.012425 | 3.21 | <i>Slc16a3</i>  | 2.86E-08 | -1.86 |
| <i>Scrn1</i>   | 0.002486 | 3.12 | <i>Pomgnt2</i>  | 2.14E-17 | -1.86 |
| <i>Cyp7b1</i>  | 0.030847 | 3.10 | <i>Fbxo16</i>   | 5.88E-11 | -1.85 |
| <i>Bmf</i>     | 9.66E-16 | 3.07 | <i>Fmc1</i>     | 5.38E-06 | -1.85 |
| <i>Hmga1</i>   | 2.12E-12 | 3.07 | <i>Slc27a1</i>  | 1.68E-15 | -1.84 |
| <i>Larp6</i>   | 7.76E-06 | 3.06 | <i>Scara5</i>   | 0.004585 | -1.84 |
| <i>Ppfia4</i>  | 0.001278 | 3.05 | <i>Ccp1os</i>   | 0.001801 | -1.84 |
| <i>Zfp36</i>   | 0.001061 | 3.05 | <i>Grem2</i>    | 2.47E-11 | -1.84 |
| <i>Rhoj</i>    | 9.37E-16 | 2.99 | <i>Nphp4</i>    | 1.98E-07 | -1.81 |
| <i>Cd38</i>    | 1.92E-06 | 2.95 | <i>Sybu</i>     | 0.004977 | -1.81 |
| <i>Serpib8</i> | 0.001607 | 2.90 | <i>Dhrs1</i>    | 4.98E-12 | -1.80 |
| <i>Tlr4</i>    | 0.000101 | 2.88 | <i>Pm20d1</i>   | 0.000226 | -1.80 |
| <i>Maff</i>    | 3.5E-11  | 2.87 | <i>Cyp17a1</i>  | 0.018829 | -1.79 |
| <i>Cav1</i>    | 3.13E-07 | 2.85 | <i>Fbxo44</i>   | 0.025153 | -1.78 |

|                 |          |      |                 |          |       |
|-----------------|----------|------|-----------------|----------|-------|
| <i>Pmepa1</i>   | 6.48E-21 | 2.85 | <i>Rasd1</i>    | 2.58E-06 | -1.77 |
| <i>Cd36</i>     | 1.5E-17  | 2.80 | <i>Ednrb</i>    | 0.034061 | -1.76 |
| <i>Tgfb2</i>    | 6.61E-07 | 2.79 | <i>Tmem177</i>  | 1.84E-05 | -1.75 |
| <i>F3</i>       | 4.7E-09  | 2.76 | <i>Map2k6</i>   | 7.89E-05 | -1.74 |
| <i>Bmper</i>    | 2.58E-06 | 2.75 | <i>Ccdc142</i>  | 0.000466 | -1.73 |
| <i>Tmeff1</i>   | 6.74E-15 | 2.73 | <i>Fbxl8</i>    | 0.007521 | -1.72 |
| <i>Pear1</i>    | 8.66E-11 | 2.72 | <i>Angptl1</i>  | 2.57E-07 | -1.72 |
| <i>Sptbn2</i>   | 0.002188 | 2.68 | <i>Sema7a</i>   | 2.73E-09 | -1.72 |
| <i>Sh3bgrl2</i> | 7.39E-07 | 2.65 | <i>Lrrc24</i>   | 6.01E-05 | -1.71 |
| <i>Rab3b</i>    | 0.027216 | 2.62 | <i>Tssk6</i>    | 0.037664 | -1.71 |
| <i>Rgcc</i>     | 1.14E-10 | 2.54 | <i>Rac3</i>     | 0.000443 | -1.70 |
| <i>Sox9</i>     | 6.79E-08 | 2.54 | <i>Amigo2</i>   | 8.87E-11 | -1.70 |
| <i>Pdgfrb</i>   | 6.65E-12 | 2.48 | <i>Dusp28</i>   | 0.001984 | -1.67 |
| <i>Klf12</i>    | 6.06E-10 | 2.48 | <i>Tmem17</i>   | 0.011355 | -1.67 |
| <i>Tpm1</i>     | 2.23E-29 | 2.47 | <i>Dnph1</i>    | 0.002209 | -1.67 |
| <i>Spata13</i>  | 6.76E-26 | 2.46 | <i>Socs1</i>    | 0.022895 | -1.67 |
| <i>Klhl29</i>   | 0.008301 | 2.45 | <i>Kcnt1</i>    | 0.000347 | -1.66 |
| <i>Pkp2</i>     | 2.16E-12 | 2.44 | <i>Ankrd9</i>   | 0.000868 | -1.66 |
| <i>Actn1</i>    | 1.5E-28  | 2.42 | <i>Mif4gd</i>   | 6.48E-11 | -1.65 |
| <i>Anpep</i>    | 9.22E-07 | 2.42 | <i>Efna1</i>    | 1.25E-07 | -1.65 |
| <i>Nfil3</i>    | 0.003855 | 2.37 | <i>Ptprz1</i>   | 0.018945 | -1.64 |
| <i>Dusp1</i>    | 0.002726 | 2.37 | <i>Dnajb13</i>  | 0.005903 | -1.63 |
| <i>Csrp1</i>    | 3.63E-12 | 2.30 | <i>Depdc1b</i>  | 0.025249 | -1.62 |
| <i>Nid1</i>     | 4.58E-06 | 2.27 | <i>Crispld2</i> | 1.28E-08 | -1.62 |
| <i>Trpv2</i>    | 0.017402 | 2.27 | <i>Tst</i>      | 5.25E-06 | -1.61 |
| <i>Orai2</i>    | 5.64E-07 | 2.26 | <i>Nr5a1</i>    | 8.82E-29 | -1.59 |
| <i>Junb</i>     | 0.049394 | 2.22 | <i>Ppt2</i>     | 1.2E-11  | -1.58 |
| <i>Adamts12</i> | 1.9E-12  | 2.22 | <i>Kit</i>      | 0.000773 | -1.57 |
| <i>Tjp2</i>     | 1.41E-15 | 2.22 | <i>Car14</i>    | 4.02E-05 | -1.57 |
| <i>Shroom3</i>  | 9.74E-06 | 2.20 | <i>Dhrs11</i>   | 3.43E-05 | -1.57 |
| <i>Vasn</i>     | 2.91E-19 | 2.20 | <i>Wdr90</i>    | 4.55E-05 | -1.56 |
| <i>Nin</i>      | 1.47E-46 | 2.19 | <i>Trpv4</i>    | 0.040445 | -1.56 |
| <i>Wipf1</i>    | 4.67E-09 | 2.19 | <i>Cdc25b</i>   | 5.64E-06 | -1.56 |
| <i>Tes</i>      | 3.99E-16 | 2.18 | <i>Enkd1</i>    | 2.36E-05 | -1.55 |
| <i>Fam129a</i>  | 3.83E-09 | 2.17 | <i>Cyb5d2</i>   | 0.029259 | -1.54 |
| <i>Fam20a</i>   | 0.00099  | 2.16 | <i>Wnt6</i>     | 0.006427 | -1.53 |
| <i>Map3k6</i>   | 1.56E-06 | 2.16 | <i>Csdc2</i>    | 9.05E-06 | -1.53 |
| <i>Sorbs1</i>   | 2.28E-09 | 2.15 | <i>Clybl</i>    | 0.002102 | -1.53 |
| <i>Wt1</i>      | 0.031616 | 2.14 | <i>Pex10</i>    | 0.016309 | -1.52 |
| <i>Stk32c</i>   | 0.00044  | 2.14 | <i>Atf1</i>     | 0.000636 | -1.52 |
| <i>Ccdc30</i>   | 0.000885 | 2.14 | <i>Naga</i>     | 5.6E-11  | -1.52 |
| <i>Zyx</i>      | 3.05E-16 | 2.09 | <i>Sap18</i>    | 4E-07    | -1.50 |
| <i>Cldn1</i>    | 0.00837  | 2.06 |                 |          |       |
| <i>Scn7a</i>    | 0.003023 | 2.06 |                 |          |       |

---

|                  |          |      |
|------------------|----------|------|
| <i>Lpar1</i>     | 4.65E-06 | 2.06 |
| <i>Glis3</i>     | 0.000225 | 2.05 |
| <i>Fjx1</i>      | 1.92E-06 | 2.04 |
| <i>Shb</i>       | 5.84E-13 | 2.03 |
| <i>Eng</i>       | 0.000515 | 2.00 |
| <i>Ets1</i>      | 0.000114 | 1.97 |
| <i>Tmem144</i>   | 1.78E-06 | 1.97 |
| <i>Tpm2</i>      | 0.020702 | 1.96 |
| <i>Rab30</i>     | 0.00018  | 1.96 |
| <i>Lsp1</i>      | 0.01133  | 1.96 |
| <i>Slc43a2</i>   | 3.15E-05 | 1.94 |
| <i>Syt14</i>     | 5.55E-09 | 1.94 |
| <i>Apba1</i>     | 0.003343 | 1.94 |
| <i>Fam124a</i>   | 0.034319 | 1.94 |
| <i>Arid5b</i>    | 4.08E-10 | 1.93 |
| <i>Hectd2</i>    | 2.58E-05 | 1.92 |
| <i>Dpysl3</i>    | 8.85E-05 | 1.91 |
| <i>Cnn2</i>      | 8.43E-06 | 1.91 |
| <i>Arhgap24</i>  | 0.041478 | 1.89 |
| <i>Ston1</i>     | 1.43E-07 | 1.88 |
| <i>Tpm4</i>      | 3.35E-19 | 1.88 |
| <i>Klf6</i>      | 0.025102 | 1.87 |
| <i>Satb2</i>     | 0.003297 | 1.86 |
| <i>Lmcd1</i>     | 0.007788 | 1.86 |
| <i>Col5a2</i>    | 1.21E-08 | 1.85 |
| <i>S1pr1</i>     | 0.002887 | 1.85 |
| <i>Clic4</i>     | 4.27E-27 | 1.85 |
| <i>Aatk</i>      | 0.006773 | 1.85 |
| <i>Efnb2</i>     | 5.45E-05 | 1.84 |
| <i>Pcbp3</i>     | 0.000977 | 1.82 |
| <i>Dact1</i>     | 4.43E-05 | 1.82 |
| <i>Zfp423</i>    | 0.003314 | 1.81 |
| <i>Lrrfip1</i>   | 6.31E-09 | 1.80 |
| <i>Col11a2</i>   | 0.033131 | 1.79 |
| <i>Shank3</i>    | 0.002663 | 1.79 |
| <i>Cttnbp2nl</i> | 2.45E-08 | 1.78 |
| <i>Pde4a</i>     | 0.002441 | 1.77 |
| <i>Enox1</i>     | 0.001328 | 1.74 |
| <i>Stx3</i>      | 1.07E-07 | 1.74 |
| <i>Kif5c</i>     | 5.4E-06  | 1.74 |
| <i>Frmd4b</i>    | 0.003996 | 1.74 |
| <i>Vgll3</i>     | 0.022052 | 1.72 |
| <i>Dtx4</i>      | 0.015132 | 1.72 |
| <i>Rassf5</i>    | 0.002608 | 1.69 |

---

|                      |          |      |
|----------------------|----------|------|
| <i>Hey1</i>          | 0.011576 | 1.68 |
| <i>Stard13</i>       | 0.000256 | 1.67 |
| <i>Mtr</i>           | 1.64E-06 | 1.63 |
| <i>Tnfrsf8</i>       | 0.007956 | 1.63 |
| <i>Tns2</i>          | 0.000129 | 1.62 |
| <i>Cebpd</i>         | 0.027523 | 1.62 |
| <i>2900026A02Rik</i> | 0.001507 | 1.59 |
| <i>Fnip2</i>         | 1.86E-08 | 1.58 |
| <i>Ldlrad4</i>       | 0.001038 | 1.57 |
| <i>Tmbim1</i>        | 1.68E-06 | 1.56 |
| <i>Peak1</i>         | 1.58E-07 | 1.54 |
| <i>Aatf</i>          | 2.85E-13 | 1.54 |
| <i>Fam117a</i>       | 0.000727 | 1.53 |
| <i>Pid1</i>          | 0.003746 | 1.52 |
| <i>Zfp608</i>        | 0.000131 | 1.52 |
| <i>Zfp583</i>        | 0.034876 | 1.51 |
| <i>Specc1</i>        | 5.92E-05 | 1.50 |

Note: Herndon *et al.* transduced rat granulosa cells with empty adenovirus or constitutively active FOXO1 and performed RNA deep sequencing post 24 hours of FSH treatment [14]. By using this strategy, they found that FOXO1 regulated the majority of FSH target genes in granulosa cells. To investigate the role of FOXO1 upon MC-LR exposure, we compared the differentially expressed genes in MC-LR treated follicles with the previously identified FOXO1 target genes. We found that there were 315 overlapped genes between two data sets. The fold change and FDR of these 315 overlapped genes were shown in this table. FDR: false discovery rate.

**Table S32.** Original data for Figure 7G: representative overlapped genes between differentially expressed genes identified in MC-LR treated murine follicles and FOXO1 target genes identified in rat granulosa cells.

| Gene<br>Symbol | Control |         |         |         |         |         |         |         |
|----------------|---------|---------|---------|---------|---------|---------|---------|---------|
|                | 1       | 2       | 3       | 4       | 5       | 6       | 7       | 8       |
| Cyp17a1        | 283.6   | 375.7   | 516.1   | 122.1   | 302.3   | 290.6   | 171.7   | 163.6   |
| Cdc25b         | 38.6    | 35.5    | 45.7    | 47.0    | 35.8    | 45.4    | 38.2    | 37.6    |
| Cebpa          | 852.7   | 749.3   | 695.5   | 719.4   | 851.9   | 841.9   | 785.6   | 709.9   |
| Nr5a1          | 256.4   | 257.8   | 277.0   | 229.6   | 281.2   | 259.4   | 254.2   | 237.6   |
| Inhbb          | 14915.7 | 14562.6 | 15015.5 | 17930.4 | 15518.8 | 16375.3 | 16407.8 | 14194.1 |
| Dhh            | 129.7   | 144.3   | 132.1   | 146.1   | 143.1   | 150.5   | 152.8   | 146.5   |
| Inha           | 48139.5 | 50601.7 | 47552.4 | 50314.7 | 47624.0 | 49898.1 | 48650.6 | 47555.2 |
| Hsd17b1        | 6372.2  | 6259.9  | 5705.8  | 6142.5  | 6585.0  | 5780.6  | 6482.0  | 6583.7  |
| Pappa          | 2.8     | 6.2     | 3.2     | 4.6     | 3.8     | 4.8     | 3.7     | 2.6     |
| Nppc           | 599.4   | 639.0   | 437.7   | 472.1   | 527.6   | 577.3   | 548.8   | 466.4   |
| Lhcgr          | 77.9    | 113.9   | 86.0    | 40.7    | 119.0   | 50.9    | 74.2    | 66.4    |
| Prlr           | 27.0    | 33.6    | 29.8    | 19.8    | 35.0    | 30.0    | 32.2    | 28.2    |
| Csdc2          | 15.6    | 14.5    | 19.2    | 16.1    | 19.4    | 14.6    | 20.6    | 14.2    |

|          |        |        |        |        |        |        |        |        |
|----------|--------|--------|--------|--------|--------|--------|--------|--------|
| Inhba    | 4767.4 | 5329.2 | 5413.9 | 5269.3 | 6554.5 | 5663.1 | 6798.0 | 5682.3 |
| Cyp19a1  | 28.2   | 38.2   | 43.7   | 36.0   | 39.8   | 32.6   | 55.1   | 26.6   |
| Vgll3    | 2.9    | 3.4    | 2.3    | 1.6    | 2.9    | 0.8    | 2.1    | 3.6    |
| Gadd45a  | 56.0   | 52.0   | 40.4   | 39.9   | 37.7   | 37.6   | 56.9   | 81.3   |
| Rnd3     | 11.7   | 8.9    | 7.3    | 8.9    | 8.1    | 7.5    | 8.1    | 12.1   |
| Shb      | 1.3    | 1.0    | 0.8    | 1.2    | 1.0    | 0.9    | 1.0    | 0.9    |
| Cald1    | 5.0    | 4.3    | 3.7    | 2.2    | 3.6    | 3.4    | 3.8    | 2.7    |
| Fn1      | 35.5   | 48.0   | 15.4   | 28.8   | 26.9   | 32.2   | 41.9   | 23.3   |
| Adamts12 | 0.9    | 0.9    | 1.0    | 0.6    | 0.7    | 0.8    | 0.7    | 0.7    |
| Ets1     | 2.4    | 2.9    | 0.9    | 1.5    | 1.0    | 2.3    | 2.5    | 1.3    |
| Wt1      | 2.6    | 1.3    | 1.1    | 1.1    | 0.2    | 0.7    | 0.6    | 0.3    |
| Tgfb2    | 2.0    | 0.6    | 0.6    | 0.6    | 0.8    | 0.5    | 0.8    | 0.6    |
| Dusp1    | 69.6   | 82.7   | 72.4   | 54.7   | 72.7   | 54.2   | 47.1   | 270.2  |
| Klf6     | 98.0   | 107.1  | 164.1  | 114.3  | 171.1  | 104.9  | 91.7   | 375.1  |
| Junb     | 294.7  | 436.2  | 878.7  | 212.4  | 738.2  | 298.6  | 218.0  | 2011.5 |

| Gene<br>Symbol | MC-LR   |         |         |         |         |         |         |
|----------------|---------|---------|---------|---------|---------|---------|---------|
|                | 1       | 2       | 3       | 4       | 5       | 6       | 7       |
| Cyp17a1        | 166.1   | 84.3    | 123.2   | 257.8   | 143.3   | 191.6   | 128.2   |
| Cdc25b         | 27.4    | 33.9    | 28.9    | 30.9    | 17.4    | 22.8    | 21.4    |
| Cebpa          | 410.5   | 394.0   | 351.5   | 466.5   | 357.6   | 441.8   | 377.1   |
| Nr5a1          | 184.0   | 163.0   | 147.8   | 164.8   | 155.3   | 176.4   | 149.5   |
| Inhbb          | 11416.0 | 9303.5  | 8714.5  | 8519.0  | 5255.1  | 7204.0  | 4519.5  |
| Dhh            | 72.7    | 75.9    | 81.0    | 71.3    | 37.1    | 44.8    | 41.3    |
| Inha           | 22819.6 | 21151.2 | 20043.4 | 26609.5 | 16320.0 | 10276.7 | 16361.9 |
| Hsd17b1        | 3541.6  | 3219.2  | 2543.5  | 3161.8  | 1794.7  | 1845.7  | 1640.5  |
| Pappa          | 0.5     | 0.4     | 0.2     | 0.8     | 0.2     | 0.4     | 0.7     |
| Nppc           | 277.7   | 248.9   | 148.3   | 416.2   | 65.9    | 76.5    | 128.3   |
| Lhcgr          | 11.6    | 13.7    | 6.5     | 24.9    | 6.2     | 7.2     | 11.2    |
| Prlr           | 14.1    | 9.8     | 8.1     | 18.9    | 14.0    | 13.1    | 18.2    |
| Csdc2          | 13.6    | 12.6    | 11.0    | 9.1     | 8.4     | 10.1    | 12.3    |
| Inhba          | 4104.0  | 2791.8  | 2162.9  | 3807.9  | 2476.5  | 2408.1  | 2453.7  |
| Cyp19a1        | 26.2    | 7.8     | 7.5     | 21.8    | 7.7     | 6.8     | 5.6     |
| Vgll3          | 4.4     | 2.6     | 2.7     | 2.6     | 6.7     | 7.4     | 3.2     |
| Gadd45a        | 220.2   | 215.9   | 168.4   | 198.0   | 227.5   | 223.8   | 174.9   |
| Rnd3           | 24.3    | 26.6    | 36.1    | 23.1    | 31.9    | 39.1    | 35.3    |
| Shb            | 2.2     | 1.7     | 2.0     | 1.5     | 2.5     | 2.4     | 2.1     |
| Cald1          | 12.8    | 9.5     | 12.3    | 7.8     | 13.1    | 17.5    | 11.1    |
| Fn1            | 188.2   | 104.3   | 167.9   | 111.1   | 245.6   | 332.9   | 166.1   |
| Adamts12       | 2.4     | 1.5     | 2.3     | 1.2     | 1.5     | 1.8     | 1.5     |
| Ets1           | 4.9     | 2.8     | 3.5     | 3.3     | 3.6     | 4.7     | 2.8     |
| Wt1            | 0.7     | 0.9     | 2.4     | 5.4     | 1.6     | 1.7     | 2.5     |
| Tgfb2          | 2.0     | 1.4     | 1.7     | 2.4     | 2.6     | 2.2     | 3.7     |
| Dusp1          | 197.7   | 172.9   | 276.1   | 178.9   | 216.4   | 170.1   | 309.0   |

|      |        |       |        |        |        |        |        |
|------|--------|-------|--------|--------|--------|--------|--------|
| Klf6 | 203.9  | 170.5 | 313.3  | 251.4  | 298.5  | 245.2  | 546.2  |
| Junb | 1024.9 | 786.7 | 1749.1 | 1202.9 | 1651.6 | 1008.5 | 2587.7 |

Note: The raw read counts were normalized based on the Transcripts Per Million (TPM) method. The normalized results were shown in this table.

**Table S33.** Numeric data for Figure 8A: PP1 phosphatase activity (picomoles) in vehicle or 10  $\mu$ M MC-LR treated follicles.

| Time    | Group   | Mean   | SD    | n/group |
|---------|---------|--------|-------|---------|
| 20 min  | Control | 665.6  | 88.4  | 3       |
|         | MC-LR   | 528.5  | 60.9  | 3       |
| 60 min  | Control | 1615.1 | 201.7 | 3       |
|         | MC-LR   | 1246.7 | 249.1 | 3       |
| 100 min | Control | 2214.7 | 236.4 | 3       |
|         | MC-LR   | 1843.8 | 219.3 | 3       |

**Table S34.** Numeric data for Figure 8B: PP2A phosphatase activity (picomoles) in vehicle or 10  $\mu$ M MC-LR treated follicles.

| Time    | Group   | Mean   | SD    | n/group |
|---------|---------|--------|-------|---------|
| 20 min  | Control | 408.7  | 66.1  | 3       |
|         | MC-LR   | 349.2  | 71.6  | 3       |
| 60 min  | Control | 1016.3 | 245.6 | 3       |
|         | MC-LR   | 827.5  | 134.8 | 3       |
| 100 min | Control | 1645.2 | 214.1 | 3       |
|         | MC-LR   | 1456.9 | 221.8 | 3       |

**Table S35.** Numeric data for Figure 8D: quantification of examined proteins by western blotting.

| Protein        | Group   | Replicate 1 | Replicate 2 | Replicate 3 |
|----------------|---------|-------------|-------------|-------------|
| pAKT-S473      | Control | 8881.4      | 10757.4     | 24792.6     |
|                | MC-LR   | 23474.2     | 31486.7     | 31072.0     |
| pAKT-T308      | Control | 24217.8     | 32324.9     | 41896.4     |
|                | MC-LR   | 12513.5     | 17617.4     | 18052.4     |
| AKT            | Control | 26437.0     | 24387.7     | 47112.8     |
|                | MC-LR   | 30678.0     | 31704.0     | 33373.4     |
| pFOXO1         | Control | 20304.1     | 16704.1     | 28132.0     |
|                | MC-LR   | 11367.7     | 8061.5      | 15659.5     |
| YH2AX          | Control | 23427.6     | 25712.3     | 33187.1     |
|                | MC-LR   | 21680.6     | 24481.9     | 28347.0     |
| PCNA           | Control | 27097.9     | 26141.9     | 30253.6     |
|                | MC-LR   | 24379.7     | 23827.4     | 29692.5     |
| $\beta$ -Actin | Control | 32006.7     | 35627.2     | 40385.8     |
|                | MC-LR   | 33581.8     | 36033.9     | 39726.2     |

Note: the western blotting bands were quantified using ImageJ software (v1.53; NIH). The original measured grey value of each protein was shown in this table.



**Table S36.** Numeric data for Figure 8E: diameters ( $\mu\text{m}$ ) of follicles treated with vehicle or 10  $\mu\text{M}$  MC-LR in the presence or absence of 25  $\mu\text{g}/\text{mL}$  740-YP.

| Day | Group                                            | Mean  | SD   | n/group |
|-----|--------------------------------------------------|-------|------|---------|
| 0   | Control                                          | 144.5 | 13.5 | 40      |
|     | MC-LR                                            | 145.0 | 11.7 | 39      |
|     | 740-YP-25<br>$\mu\text{g}/\text{mL}$             | 141.7 | 14.2 | 43      |
|     | 740-YP-25<br>$\mu\text{g}/\text{mL}$ & MC-<br>LR | 144.4 | 11.2 | 42      |
| 2   | Control                                          | 176.6 | 20.7 | 40      |
|     | MC-LR                                            | 173.3 | 24.3 | 39      |
|     | 740-YP-25<br>$\mu\text{g}/\text{mL}$             | 169.7 | 22.5 | 43      |
|     | 740-YP-25<br>$\mu\text{g}/\text{mL}$ & MC-<br>LR | 175.2 | 23.4 | 42      |
| 4   | Control                                          | 250.3 | 39.3 | 40      |
|     | MC-LR                                            | 247.5 | 38.8 | 39      |
|     | 740-YP-25<br>$\mu\text{g}/\text{mL}$             | 236.5 | 37.8 | 43      |
|     | 740-YP-25<br>$\mu\text{g}/\text{mL}$ & MC-<br>LR | 249.5 | 38.3 | 42      |
| 6   | Control                                          | 321.5 | 55.1 | 40      |
|     | MC-LR                                            | 302.0 | 30.8 | 39      |
|     | 740-YP-25<br>$\mu\text{g}/\text{mL}$             | 300.6 | 50.6 | 43      |
|     | 740-YP-25<br>$\mu\text{g}/\text{mL}$ & MC-<br>LR | 301.5 | 43.4 | 42      |

**Table S37.** Numeric data for Figure 8F: survival rates (%) of follicles treated with vehicle or 10  $\mu\text{M}$  MC-LR in the presence or absence of 25  $\mu\text{g}/\text{mL}$  740-YP.

| Day | Group                                            | Mean  | SD  | n/group |
|-----|--------------------------------------------------|-------|-----|---------|
| 0   | Control                                          | 100.0 | 0.0 | 40      |
|     | MC-LR                                            | 100.0 | 0.0 | 39      |
|     | 740-YP-25<br>$\mu\text{g}/\text{mL}$             | 100.0 | 0.0 | 43      |
|     | 740-YP-25<br>$\mu\text{g}/\text{mL}$ & MC-<br>LR | 100.0 | 0.0 | 42      |
| 2   | Control                                          | 100.0 | 0.0 | 40      |
|     | MC-LR                                            | 100.0 | 0.0 | 39      |
|     | 740-YP-25<br>$\mu\text{g}/\text{mL}$             | 100.0 | 0.0 | 43      |

|   |                                |       |      |    |
|---|--------------------------------|-------|------|----|
|   | 740-YP-25<br>µg/mL & MC-<br>LR | 100.0 | 0.0  | 42 |
| 4 | Control                        | 97.6  | 4.1  | 40 |
|   | MC-LR                          | 97.8  | 3.8  | 39 |
|   | 740-YP-25<br>µg/mL             | 100.0 | 0.0  | 43 |
|   | 740-YP-25<br>µg/mL & MC-<br>LR | 95.2  | 4.1  | 42 |
| 6 | Control                        | 94.9  | 8.9  | 40 |
|   | MC-LR                          | 91.1  | 10.2 | 39 |
|   | 740-YP-25<br>µg/mL             | 93.3  | 11.5 | 43 |
|   | 740-YP-25<br>µg/mL & MC-<br>LR | 90.1  | 8.6  | 42 |

**Table S38.** Numeric data for Figure 8G: expression of follicle maturation-related genes in follicles.

| <b>Gene</b>  | <b>Group</b>      | <b>Mean (a.u.)</b> | <b>SD</b> | <b>n/group</b> |
|--------------|-------------------|--------------------|-----------|----------------|
| <i>Comp</i>  | Control           | 5.6                | 4.0       | 10             |
|              | 740-YP            | 6.8                | 2.5       | 11             |
|              | MC-LR             | 2.4                | 1.3       | 12             |
|              | 740-YP &<br>MC-LR | 3.5                | 1.4       | 12             |
| <i>Inha</i>  | Control           | 182.1              | 27.1      | 10             |
|              | 740-YP            | 186.9              | 47.1      | 11             |
|              | MC-LR             | 92.2               | 27.2      | 12             |
|              | 740-YP &<br>MC-LR | 139.8              | 46.6      | 12             |
| <i>Pappa</i> | Control           | 0.8                | 0.4       | 10             |
|              | 740-YP            | 0.8                | 0.5       | 11             |
|              | MC-LR             | 0.2                | 0.1       | 12             |
|              | 740-YP &<br>MC-LR | 0.4                | 0.1       | 12             |
| <i>Lhcgr</i> | Control           | 3.4                | 1.9       | 10             |
|              | 740-YP            | 3.4                | 1.9       | 11             |
|              | MC-LR             | 0.5                | 0.2       | 12             |
|              | 740-YP &<br>MC-LR | 1.3                | 0.7       | 12             |

**Table S39.** Numeric data for Figure 8H: percentages of ruptured follicles at 16 hours post-hCG.

| <b>Group</b>   | <b>Mean</b> | <b>SD</b> | <b>n/group</b> |
|----------------|-------------|-----------|----------------|
| Control        | 93.9        | 5.4       | 36             |
| 740-YP         | 93.7        | 5.7       | 34             |
| MC-LR          | 16.9        | 3.9       | 35             |
| 740-YP & MC-LR | 48.2        | 7.4       | 34             |

**Table S40.** Numeric data for Figure 9A: PP1 phosphatase activities in vehicle or 10  $\mu$ M MC-LR treated human primary granulosa cells.

| <b>Time</b> | <b>Group</b> | <b>Mean</b> | <b>SD</b> | <b>n/group</b> |
|-------------|--------------|-------------|-----------|----------------|
| 20 min      | Control      | 57.2        | 16.2      | 3              |
|             | MC-LR        | 17.8        | 11.8      | 3              |
| 60 min      | Control      | 54.4        | 16.1      | 3              |
|             | MC-LR        | 12.5        | 8.0       | 3              |
| 100 min     | Control      | 68.2        | 15.5      | 3              |
|             | MC-LR        | 18.0        | 12.7      | 3              |

**Table S41.** Numeric data for Figure 9B: PP2A phosphatase activities in vehicle or 10  $\mu$ M MC-LR treated human primary granulosa cells.

| <b>Time</b> | <b>Group</b> | <b>Mean</b> | <b>SD</b> | <b>n/group</b> |
|-------------|--------------|-------------|-----------|----------------|
| 20 min      | Control      | 48.3        | 28.7      | 3              |
|             | MC-LR        | 32.2        | 23.3      | 3              |
| 60 min      | Control      | 60.8        | 28.2      | 3              |
|             | MC-LR        | 38.2        | 25.1      | 3              |
| 100 min     | Control      | 77.4        | 28.7      | 3              |
|             | MC-LR        | 51.6        | 25.8      | 3              |

**Table S42.** Numeric data for Figure 9C: quantification of western blotting for phosphorylated FOXO1 in human primary granulosa cells.

| <b>Protein</b> | <b>Group</b> | <b>Replicate 1</b> | <b>Replicate 2</b> | <b>Replicate 3</b> |
|----------------|--------------|--------------------|--------------------|--------------------|
| pFOXO1         | Control      | 2977.8             | 12053.2            | 12212.3            |
|                | MC-LR        | 1436.9             | 6267.9             | 7953.8             |
| $\beta$ -Actin | Control      | 12888.9            | 10829.7            | 14628.7            |
|                | MC-LR        | 11432.2            | 11524.8            | 14032.2            |

Note: the western blotting bands were quantified using ImageJ software (v1.53; NIH). The original measured grey value of each protein was shown in this table.

**Table S43.** Numeric data for Figure 9D: expression of follicle maturation-related genes in vehicle or 10  $\mu$ M MC-LR treated human primary granulosa cells.

| Gene           | Group   | Mean (a.u.) | SD       | n/group |
|----------------|---------|-------------|----------|---------|
| <i>Lhcgr</i>   | Control | 3.3         | 0.6      | 3       |
|                | MC-LR   | 3.3         | 0.3      | 3       |
| <i>Fshr</i>    | Control | 3.9         | 0.6      | 3       |
|                | MC-LR   | 1.7         | 0.6      | 3       |
| <i>Pappa</i>   | Control | 3.9         | 0.3      | 3       |
|                | MC-LR   | 9.6         | 1.6      | 3       |
| <i>Cyp19a1</i> | Control | 19.2        | 3.0      | 3       |
|                | MC-LR   | 9.9         | 4.1      | 3       |
| <i>Comp</i>    | Control | 1.1         | 0.4      | 3       |
|                | MC-LR   | 1.2         | 0.4      | 3       |
| <i>Inha</i>    | Control | 6.9         | 0.6      | 3       |
|                | MC-LR   | 5.7         | 0.5      | 3       |
| <i>Inhba</i>   | Control | 686594.4    | 53522.3  | 3       |
|                | MC-LR   | 639211.8    | 202804.7 | 3       |
| <i>Inhbb</i>   | Control | 1.8         | 0.4      | 3       |
|                | MC-LR   | 1.1         | 0.3      | 3       |

**Table S44.** Differential gene expression of oxidative stress genes induced by MC-LR using single-follicle RNA-seq.

| Gene<br>Symbol                             | FDR             | Fold<br>change | Gene<br>Symbol                    | FDR             | Fold change  |
|--------------------------------------------|-----------------|----------------|-----------------------------------|-----------------|--------------|
| Glutathione peroxidase                     |                 |                | <i>Aox2</i>                       | 0.629712        | -1.25        |
| <i>Gpx1</i>                                | 2.69E-09        | 1.49           | <b><i>Aox3</i></b>                | <b>0.047462</b> | <b>4.93</b>  |
| <i>Gpx3</i>                                | 0.234339        | 1.4            | <i>Aox4</i>                       | 0.012576        | -1.44        |
| <i>Gpx4</i>                                | 0.017853        | -1.14          | <i>Ephx1</i>                      | 0.000194        | -1.41        |
| <i>Gpx6</i>                                | 0.762612        | 1.95           | <i>Ephx2</i>                      | 0.222292        | 1.10         |
| <i>Gpx7</i>                                | 0.088809        | -1.17          | <i>Ephx3</i>                      | 0.523748        | 1.80         |
| <i>Gpx8</i>                                | 0.799543        | 1.02           | <i>Ephx4</i>                      | 0.891817        | -1.39        |
| <i>Gstp1</i>                               | 9.72E-11        | 1.42           | <i>Bnip1</i>                      | 0.025701        | -1.26        |
| <i>Gstp2</i>                               | 0.07082         | 2.73           | <i>Bnip2</i>                      | 0.225673        | -1.07        |
| Peroxiredoxins                             |                 |                | <b><i>Bnip3</i></b>               | <b>5.84E-20</b> | <b>-2.34</b> |
| <i>Prdx1</i>                               | 0.484905        | 1.04           | <i>Mpv17</i>                      | 0.868155        | -1.02        |
| <i>Prdx2</i>                               | 0.608307        | 1.03           | Oxidative stress-responsive genes |                 |              |
| <i>Prdx3</i>                               | 0.011774        | -1.16          | <i>Txn1</i>                       | 0.000353        | 1.24         |
| <i>Prdx4</i>                               | 0.000122        | -1.34          | <i>Txn2</i>                       | 0.4955          | 1.05         |
| <i>Prdx5</i>                               | 0.335076        | -1.08          | <i>Krt1</i>                       | 0.887693        | -1.06        |
| <i>Prdx6</i>                               | 0.725722        | -1.03          | <i>Gclm</i>                       | 0.000764        | 1.29         |
| Peroxidases and antioxidants related genes |                 |                | <i>Msra</i>                       | 0.388201        | 1.10         |
| <i>Cybb</i>                                | 0.133662        | 1.79           | <i>Cat</i>                        | 0.055657        | 1.18         |
| <i>Mgst1</i>                               | 3.98E-08        | 1.31           | <b><i>Ccl5</i></b>                | <b>0.005531</b> | <b>16.75</b> |
| <b><i>Mgst2</i></b>                        | <b>0.049618</b> | <b>2.47</b>    | <b><i>Dusp1</i></b>               | <b>0.002726</b> | <b>2.37</b>  |

|                                     |                 |              |                      |                 |              |
|-------------------------------------|-----------------|--------------|----------------------|-----------------|--------------|
| <i>Mgst3</i>                        | 6.86E-12        | -1.69        | <i>Hmox1</i>         | <b>2.23E-30</b> | <b>1.94</b>  |
| <i>Ptgs1</i>                        | 0.513398        | 1.59         | <i>Txnrd1</i>        | <b>3.27E-50</b> | <b>1.82</b>  |
| <b><i>Ptgs2</i></b>                 | <b>3.22E-15</b> | <b>26.38</b> | <i>Txnrd2</i>        | 0.786981        | 1.04         |
| <i>Pxdn</i>                         | 0.236651        | 1.07         | <i>Atox1</i>         | 0.000259        | -1.32        |
| Superoxide dismutases               |                 |              | <b><i>Hspa1a</i></b> | <b>8.59E-12</b> | <b>-2.48</b> |
| <i>Sod1</i>                         | 0.454192        | -1.05        | <i>Dhcr24</i>        | 0.002132        | -1.22        |
| <i>Sod2</i>                         | 3.25E-05        | -1.26        | <b><i>Nqo1</i></b>   | <b>0.040914</b> | <b>1.56</b>  |
| <i>Sod3</i>                         | 0.057711        | -1.47        | <i>Nudt1</i>         | 0.465971        | -1.13        |
| Superoxide metabolism related genes |                 |              | <b><i>Ttn</i></b>    | <b>0.008176</b> | <b>2.30</b>  |
| <i>Ncf1</i>                         | 0.752746        | 1.28         | <i>Gclc</i>          | 0.000177        | 1.29         |
| <b><i>Ncf2</i></b>                  | <b>0.001975</b> | <b>2.24</b>  | <b><i>Gss</i></b>    | <b>8.83E-13</b> | <b>2.27</b>  |
| <b><i>Ncf4</i></b>                  | <b>0.000201</b> | <b>10.59</b> | <b><i>Apoe</i></b>   | <b>0.015151</b> | <b>1.60</b>  |
| <i>Nos1</i>                         | 0.360395        | 1.43         | <i>Oxr1</i>          | 0.002446        | -1.17        |
| <i>Nos2</i>                         | 0.427773        | 1.22         | <i>Oxsr1</i>         | 0.000342        | -1.19        |
| <b><i>Nos3</i></b>                  | <b>1.47E-10</b> | <b>-3.21</b> | <b><i>Foxm1</i></b>  | <b>7.55E-07</b> | <b>-1.63</b> |
| <i>Nox1</i>                         | 0.358752        | 3.81         | <i>Pdlim1</i>        | 0.008054        | 1.22         |
| <i>Nox4</i>                         | 0.895899        | -1.05        | <i>Pnkp</i>          | 0.546601        | -1.05        |
| <b><i>Prex1</i></b>                 | <b>0.001458</b> | <b>1.5</b>   | <i>Prnp</i>          | 0.40789         | -1.07        |
| <b><i>Prex2</i></b>                 | <b>0.006074</b> | <b>-2.95</b> | <i>Fth1</i>          | 2.76E-20        | 1.30         |
| <i>Ucp2</i>                         | 0.593742        | -1.08        | <i>Rnf7</i>          | 1.28E-05        | -1.29        |
| <i>Duox1</i>                        | 0.768706        | -1.21        | <b><i>Scara3</i></b> | <b>1.04E-11</b> | <b>3.84</b>  |
| <b><i>Duox2</i></b>                 | <b>3.61E-08</b> | <b>2.79</b>  | <i>Gsr</i>           | 0.00289         | 1.20         |
| <i>Mt1</i>                          | 0.003558        | 1.5          | <i>Sirt2</i>         | 0.114793        | -1.11        |
| <b><i>Mt2</i></b>                   | <b>6.92E-10</b> | <b>2.64</b>  | <b><i>Sqstm1</i></b> | <b>2.62E-18</b> | <b>1.52</b>  |
| <i>Mt3</i>                          | 0.411034        | -1.46        | <b><i>Srxn1</i></b>  | <b>1.9E-106</b> | <b>6.53</b>  |
| <i>Ccs</i>                          | 0.013469        | -1.27        | <i>Stk25</i>         | 0.025903        | -1.10        |
| <b><i>Alox5</i></b>                 | <b>0.007233</b> | <b>7.01</b>  | <i>Mbl2</i>          | 0.633729        | 1.24         |
| <i>Alox12</i>                       | 0.236651        | 1.84         | Oxygen transporters  |                 |              |
| ROS metabolism related genes        |                 |              | <b><i>Cygb</i></b>   | <b>2.13E-10</b> | <b>3.17</b>  |
| <b><i>Aox1</i></b>                  | <b>0.000763</b> | <b>1.62</b>  |                      |                 |              |

Note: The differentially expressed genes (DEGs) were identified with absolute fold change > 1.5 and FDR adjusted *p*-value <0.05. The DEGs were highlighted in bold.

**Table S45.** Differential gene expression of autophagy related genes induced by MC-LR using single-follicle RNA-seq.

| Gene Symbol             | FDR      | Fold change | Gene Symbol    | FDR      | Fold change |
|-------------------------|----------|-------------|----------------|----------|-------------|
| Initiation of autophagy |          |             | <i>Atg9b</i>   | 0.823436 | 1.11        |
| <i>Mtor</i>             | 0.342134 | -1.06       | <i>Atg10</i>   | 0.400832 | -1.20       |
| <i>Rptor</i>            | 0.04807  | 1.11        | <i>Atg12</i>   | 1.31E-09 | -1.27       |
| <i>Ulk1</i>             | 0.015702 | 1.15        | <i>Atg14</i>   | 0.428791 | -1.07       |
| <i>Atg13</i>            | 0.381834 | 1.06        | <i>Atg16l1</i> | 0.046813 | -1.16       |
| <i>Rb1cc1</i>           | 0.001186 | 1.18        | <i>Atg16l2</i> | 0.04127  | 1.23        |
| <i>Atg101</i>           | 0.795196 | 1.03        | <i>Wipi1</i>   | 0.9456   | 1.01        |
| Autophagosome formation |          |             | <i>Wipi2</i>   | 0.670857 | -1.02       |

|                     |                 |              |                         |                 |             |
|---------------------|-----------------|--------------|-------------------------|-----------------|-------------|
| <i>Atg2a</i>        | 0.009368        | 1.13         | <i>Pik3c3</i>           | 0.975624        | -1.00       |
| <i>Atg2b</i>        | 0.597959        | 1.03         | <i>Pik3r4</i>           | 0.000121        | -1.21       |
| <i>Atg3</i>         | 0.227213        | 1.09         | <i>Becn1</i>            | 0.126115        | -1.08       |
| <i>Atg4a</i>        | 0.110177        | 1.21         | <i>Uvrag</i>            | 0.02529         | -1.14       |
| <i>Atg4b</i>        | 0.029092        | 1.13         | <i>Ambra1</i>           | 0.843854        | 1.02        |
| <b><i>Atg4c</i></b> | <b>0.000143</b> | <b>-1.54</b> | <i>Map1lc3a</i>         | 0.000251        | 1.20        |
| <i>Atg4d</i>        | 0.264684        | -1.10        | <i>Map1lc3b</i>         | 0.011875        | 1.10        |
| <i>Atg5</i>         | 0.792237        | 1.02         | <b><i>Gabarapl1</i></b> | <b>3.99E-15</b> | <b>1.73</b> |
| <i>Atg7</i>         | 0.112621        | 1.17         | <i>Gabarapl2</i>        | 0.281379        | -1.11       |
| <i>Atg9a</i>        | 0.449925        | -1.06        | <i>Gabarap</i>          | 0.014694        | 1.11        |

Note: The differentially expressed genes (DEGs) were identified with absolute fold change > 1.5 and FDR adjusted *p*-value <0.05. The DEGs were highlighted in bold.

**Table S46.** Differential gene expression of inflammation related genes induced by MC-LR using single-follicle RNA-seq.

| <b>Gene Symbol</b> | <b>FDR</b> | <b>Fold change</b> | <b>Gene Symbol</b> | <b>FDR</b> | <b>Fold change</b> |
|--------------------|------------|--------------------|--------------------|------------|--------------------|
| <i>Spp1</i>        | 2.11E-34   | 719.78             | <i>Mmp9</i>        | 4.63E-18   | 15.16              |
| <i>Mmp13</i>       | 1.6E-10    | 162.18             | <i>Cxcl1</i>       | 4.91E-08   | 14.81              |
| <i>Ccl6</i>        | 7.67E-06   | 154.83             | <i>Tnf</i>         | 2.93E-07   | 13.14              |
| <i>Serpinb2</i>    | 4.19E-19   | 124.90             | <i>Il11</i>        | 0.008537   | 12.74              |
| <i>Ccr1</i>        | 1.97E-09   | 117.84             | <i>Clcf1</i>       | 0.000598   | 12.38              |
| <i>Hp</i>          | 2.52E-07   | 94.77              | <i>Tnfaip6</i>     | 4.07E-55   | 11.83              |
| <i>Fmod</i>        | 2.56E-09   | 86.07              | <i>Ereg</i>        | 1.73E-10   | 11.41              |
| <i>Cemip</i>       | 2.41E-14   | 76.18              | <i>Il6ra</i>       | 1.71E-21   | 10.92              |
| <i>Ankrd1</i>      | 8.14E-07   | 73.48              | <i>Il6</i>         | 0.001003   | 9.70               |
| <i>Ifi202b</i>     | 6.05E-30   | 72.22              | <i>Mmp25</i>       | 0.008134   | 9.57               |
| <i>Ccl7</i>        | 1.64E-07   | 69.88              | <i>Cxcl5</i>       | 2.47E-06   | 8.40               |
| <i>Saa3</i>        | 6.84E-16   | 64.61              | <i>Mmp19</i>       | 8.63E-17   | 7.94               |
| <i>Gbp5</i>        | 7.23E-06   | 58.35              | <i>Cd44</i>        | 9.26E-45   | 7.13               |
| <i>Rgs1</i>        | 1.07E-06   | 57.98              | <i>Clec10a</i>     | 0.003004   | 7.10               |
| <i>Ptx3</i>        | 1.91E-22   | 49.06              | <i>Cxcl14</i>      | 1.14E-05   | 6.94               |
| <i>Mmp10</i>       | 4.14E-05   | 48.08              | <i>Il1rl2</i>      | 2.75E-33   | 5.70               |
| <i>Ccl9</i>        | 7.65E-13   | 43.99              | <i>Mmp24</i>       | 0.001205   | 5.46               |
| <i>Cxcl10</i>      | 1.43E-11   | 39.11              | <i>Lif</i>         | 5.69E-06   | 5.20               |
| <i>Tnr</i>         | 9.63E-10   | 36.06              | <i>Il7</i>         | 1.19E-24   | 5.12               |
| <i>Il33</i>        | 6.09E-05   | 35.60              | <i>Ccl3</i>        | 0.001668   | 5.01               |
| <i>Il7r</i>        | 6.39E-07   | 35.42              | <i>Ccn1</i>        | 8.54E-05   | 4.84               |
| <i>Tnc</i>         | 6.27E-26   | 33.03              | <i>Mmp28</i>       | 0.000217   | 4.20               |
| <i>Mmp12</i>       | 7.99E-07   | 32.89              | <i>Mmp2</i>        | 6.95E-09   | 3.82               |
| <i>Sema3e</i>      | 3.85E-13   | 26.50              | <i>Il16</i>        | 0.039833   | 3.54               |
| <i>Ptgs2</i>       | 3.22E-15   | 26.38              | <i>Il10ra</i>      | 0.000532   | 3.38               |
| <i>Pf4</i>         | 0.037346   | 26.17              | <i>Il13ra1</i>     | 1.31E-10   | 3.12               |
| <i>Ccr5</i>        | 0.000111   | 25.14              | <i>Mmp11</i>       | 1.01E-18   | 2.91               |
| <i>Fgf21</i>       | 3.5E-07    | 24.57              | <i>Mmp14</i>       | 4.42E-27   | 2.87               |

|              |          |       |                |          |      |
|--------------|----------|-------|----------------|----------|------|
| <i>Il1rn</i> | 1.72E-09 | 24.36 | <i>Il34</i>    | 0.019853 | 2.79 |
| <i>Ccl2</i>  | 9.25E-07 | 24.18 | <i>Tgfb2</i>   | 6.61E-07 | 2.79 |
| <i>Cxcl2</i> | 2.62E-08 | 21.61 | <i>Il23a</i>   | 0.011036 | 2.71 |
| <i>Ptprn</i> | 1.31E-23 | 20.94 | <i>Mt2</i>     | 6.92E-10 | 2.64 |
| <i>C3</i>    | 6.83E-10 | 20.94 | <i>Il2rb</i>   | 0.039101 | 2.56 |
| <i>Edn1</i>  | 7.53E-26 | 19.55 | <i>Il12rb1</i> | 0.027228 | 2.55 |
| <i>Ngf</i>   | 0.03522  | 19.46 | <i>Il20rb</i>  | 0.014366 | 2.31 |
| <i>Ccl5</i>  | 0.005531 | 16.75 | <i>Cxcl12</i>  | 0.005769 | 2.06 |
| <i>Il1a</i>  | 0.002639 | 16.14 | <i>Il17ra</i>  | 5.33E-08 | 1.86 |
| <i>Ccl4</i>  | 0.000695 | 15.58 | <i>Mmp16</i>   | 0.000976 | 1.79 |

### References cited in Supplemental Materials

1. Mankanji, Y., et al., *Inhibin at 90: From Discovery to Clinical Application, a Historical Review*. Endocrine Reviews, 2014. **35**(5): p. 747-794.
2. Skory, R.M., et al., *Microarray analysis identifies COMP as the most differentially regulated transcript throughout in vitro follicle growth*. Molecular Reproduction and Development, 2013. **80**(2): p. 132-144.
3. Ghosh, D., et al., *Structural basis for androgen specificity and oestrogen synthesis in human aromatase*. Nature, 2009. **457**(7226): p. 219-23.
4. Simoni, M., J. Gromoll, and E. Nieschlag, *The follicle-stimulating hormone receptor: biochemistry, molecular biology, physiology, and pathophysiology*. Endocr Rev, 1997. **18**(6): p. 739-73.
5. Law, N.C., et al., *Lhcgr expression in granulosa cells: roles for PKA-phosphorylated beta-catenin, TCF3, and FOXO1*. Mol Endocrinol, 2013. **27**(8): p. 1295-310.
6. Nyegaard, M., et al., *Lack of functional pregnancy-associated plasma protein-A (PAPPa) compromises mouse ovarian steroidogenesis and female fertility*. Biol Reprod, 2010. **82**(6): p. 1129-38.
7. Robker, R.L., L.K. Akison, and D.L. Russell, *Control of oocyte release by progesterone receptor-regulated gene expression*. Nucl Recept Signal, 2009. **7**: p. e012.
8. Jo, M. and T.E. Curry, Jr., *Luteinizing hormone-induced RUNX1 regulates the expression of genes in granulosa cells of rat periovulatory follicles*. Mol Endocrinol, 2006. **20**(9): p. 2156-72.
9. Richards, J.S. and S.A. Pangas, *The ovary: basic biology and clinical implications*. J Clin Invest, 2010. **120**(4): p. 963-72.
10. Duffy, D.M., et al., *Ovulation: Parallels With Inflammatory Processes*. Endocr Rev, 2019. **40**(2): p. 369-416.
11. Takahashi, T., et al., *Cyclooxygenase-2-derived prostaglandin E(2) directs oocyte maturation by differentially influencing multiple signaling pathways*. J Biol Chem, 2006. **281**(48): p. 37117-29.
12. Lim, H., et al., *Multiple female reproductive failures in cyclooxygenase 2-deficient mice*. Cell, 1997. **91**(2): p. 197-208.

13. Mukhopadhyay, D., et al., *Two distinct populations of tumor necrosis factor-stimulated gene-6 protein in the extracellular matrix of expanded mouse cumulus cell-oocyte complexes*. Arch Biochem Biophys, 2001. **394**(2): p. 173-81.
14. Herndon, M.K., et al., *Forkhead box O member FOXO1 regulates the majority of follicle-stimulating hormone responsive genes in ovarian granulosa cells*. Mol Cell Endocrinol, 2016. **434**: p. 116-26.
