# Supplementary material
Source: PubMed Central journal article supplement (PMC10284350)
Supplement: ehp12034.smcontents.508.pdf [file ehp12034.smcontents.508.pdf]

**Note to readers with disabilities:** *EHP* strives to ensure that all journal content is accessible to all readers. However, some figures and Supplemental Material published in *EHP* articles may not conform to [508 standards](#) due to the complexity of the information being presented. If you need assistance accessing journal content, please contact [ehp508@niehs.nih.gov](mailto:ehp508@niehs.nih.gov). Our staff will work with you to assess and meet your accessibility needs within 3 working days.

### **Supplemental Material**

#### **Effects of Cyanobacterial Harmful Algal Bloom Toxin Microcystin-LR on Gonadotropin-Dependent Ovarian Follicle Maturation and Ovulation in Mice**

Yingzheng Wang, Pawat Pattarawat, Jiyang Zhang, Eunchong Kim, Delong Zhang, Mingzhu Fang, Elizabeth A. Jannaman, Ye Yuan, Saurabh Chatterjee, Ji-Yong Julie Kim, Geoffrey I. Scott, Qiang Zhang, and Shuo Xiao

#### **Table of Contents**

**Figure S1.** Detection of non-specific antibody binding in mouse ovary for the immunohistochemistry using normal rabbit IgG.

**Figure S2.** The *ex vivo* point of departure of MC-LR on failed follicle rupture and oocyte meiosis based on benchmark dose modeling. (A) Frequentist quantal linear model with BMR of 10% extra risk for the BMC and 95% lower confidence limit for the BMCL. (B) Frequentist Log-Probit model with BMR of 10% extra risk for the BMC and 95% lower confidence limit for the BMCL. BMR: benchmark response; BMC: benchmark concentration; BMCL: 95% lower confidence limit of BMC.

**Figure S3.** Quality control of single-follicle RNA sequencing reveals good sequencing quality, including sequencing read quality, number of detected genes, and read alignments. Data for Figure S3 can also be found in Table S26.

**Table S1.** Primer sequences used for RT-qPCR in this study.

**Table S2.** Numeric data for Figure 1B: body weight (g).

**Table S3.** Numeric data for Figure 1C: estrous cycle days.

**Table S4.** Numeric data for Figure 1E: total numbers of various stages of follicles per ovary in 1xPBS or MC-LR treated mice.

**Table S5.** Numeric data for Figure 1F: total numbers of corpora lutea (CL) per ovary in 1xPBS or MC-LR treated mice.

**Table S6.** Numeric data for Figure 2B: total numbers of ovulated oocytes from mice treated with 1xPBS or MC-LR.

**Table S7.** Numeric data for Figure 2D: percentages of ovulated MII oocytes (%) in mice treated with 1xPBS or MC-LR.

**Table S8.** Numeric data for Figure 2F: total numbers of un-ovulated late-staged antral follicles per mouse in 1xPBS or MC-LR treatment groups.

**Table S9.** Numeric data for Figure 3A: total numbers of ovulated oocytes and percentages of MII oocytes from mice treated with 1xPBS or MC-LR at 1 hour before hCG injection.

**Table S10.** Numeric data for Figure 3B: total numbers of ovulated oocytes and percentages of MII oocytes from mice treated with 1xPBS or MC-LR during follicle maturation window.

**Table S11.** Numeric data for Figure 4B: follicle diameter ( $\mu\text{m}$ ).

**Table S12.** Established follicle maturation-related genes and their functions.

**Table S13.** Numeric data for Figure 4D: gene expression.

**Table S14.** Numeric data for Figure 4E: Immunohistochemistry quantification for LHCGR.

**Table S15.** Numeric data for Figure 4F: Immunohistochemistry quantification for PAPPA.

**Table S16.** Numeric data for Figure 5B: follicle survival rate (%) upon MC-LR treatment.

**Table S17.** Numeric data for Figure 5C: follicle diameter ( $\mu\text{m}$ ) upon MC-LR treatment.

**Table S18.** Numeric data for Figure 5D: estradiol concentration (ng/mL) upon MC-LR treatment.

**Table S19.** Numeric data for Figure 5E: testosterone concentration (pg/mL) upon MC-LR treatment.

**Table S20.** Numeric data for Figure 5G: follicle rupture percentage (%) and MII oocyte percentage (%) upon MC-LR treatment.

**Table S21.** Numeric data for Figure 5H: progesterone concentration (ng/mL) upon MC-LR treatment.

**Table S22.** Numeric data for Figure 6B: expression of follicle maturation-related genes.

**Table S23.** Numeric data for Figure 6C: expression of follicle maturation-related genes in isolated mural granulosa cells.

**Table S24.** Established ovulatory genes and their identified functions in ovulation.

**Table S25.** Numeric data for Figure 6D: expression of established ovulatory genes in vehicle or MC-LR treated follicles.

**Table S26.** Quality control analysis of single-follicle RNA sequencing, including sequencing read quality and number of detected genes in control and MC-LR treated follicles.

**Table S27.** Original data for Figure 7C: Gene Ontology (GO) analysis of differentially expressed genes; Top 10 biological process (BP) enrichment results.

**Table S28.** Original data for Figure 7D: Gene Ontology (GO) analysis of differentially expressed genes; Top 10 molecular function (MF) enrichment results.

**Table S29.** Original data for Figure 7E: Gene Ontology (GO) analysis of differentially expressed genes; Top 10 cellular component (CC) enrichment results.

**Table S30.** Original data for Figure 7F: Top 10 KEGG pathway enrichment results of differentially expressed genes. KEGG: Kyoto Encyclopedia of Genes and Genomes.

**Table S31.** A summary of all overlapped 315 genes between MC-LR induced DEGs and previously identified FOXO1 target genes in the granulosa cells.

**Table S32.** Original data for Figure 7G: representative overlapped genes between differentially expressed genes identified in MC-LR treated murine follicles and FOXO1 target genes identified in rat granulosa cells.

**Table S33.** Numeric data for Figure 8A: PP1 phosphatase activity (picomoles) in vehicle or 10  $\mu$ M MC-LR treated follicles.

**Table S34.** Numeric data for Figure 8B: PP2A phosphatase activity (picomoles) in vehicle or 10  $\mu$ M MC-LR treated follicles.

**Table S35.** Numeric data for Figure 8D: quantification of examined proteins by western blotting.

**Table S36.** Numeric data for Figure 8E: diameters ( $\mu$ m) of follicles treated with vehicle or 10  $\mu$ M MC-LR in the presence or absence of 25  $\mu$ g/mL 740-YP.

**Table S37.** Numeric data for Figure 8F: survival rates (%) of follicles treated with vehicle or 10  $\mu$ M MC-LR in the presence or absence of 25  $\mu$ g/mL 740-YP.

**Table S38.** Numeric data for Figure 8G: expression of follicle maturation-related genes in follicles.

**Table S39.** Numeric data for Figure 8H: percentages of ruptured follicles at 16 hours post-hCG.

**Table S40.** Numeric data for Figure 9A: PP1 phosphatase activities in vehicle or 10  $\mu$ M MC-LR treated human primary granulosa cells.

**Table S41.** Numeric data for Figure 9B: PP2A phosphatase activities in vehicle or 10  $\mu$ M MC-LR treated human primary granulosa cells.

**Table S42.** Numeric data for Figure 9C: quantification of western blotting for phosphorylated FOXO1 in human primary granulosa cells.

**Table S43.** Numeric data for Figure 9D: expression of follicle maturation-related genes in vehicle or 10  $\mu$ M MC-LR treated human primary granulosa cells.

**Table S44.** Differential gene expression of oxidative stress genes induced by MC-LR using single-follicle RNA-seq.

**Table S45.** Differential gene expression of autophagy related genes induced by MC-LR using single-follicle RNA-seq.

**Table S46.** Differential gene expression of inflammation related genes induced by MC-LR using single-follicle RNA-seq.

## **References**
